# Supplementary material for: microRNA-22 Promotes Heart Failure through Coordinate Suppression of PPAR/ERR-Nuclear Hormone Receptor Transcription
Source: PubMed Central journal article supplement (PMC3785418; doi:10.1371/journal.pone.0075882), 2013-09-27
Supplement: pone.0075882.s006.pdf [file pone.0075882.s006.pdf]

**Table S1. Hemodynamic analysis of TG-H mice and WT controls**

|                            | 8-weeks old |                        |
|----------------------------|-------------|------------------------|
|                            | WT          | TG-H                   |
| <i>n</i>                   | 4-7         | 5-6                    |
| HR (bpm)                   | 424 ± 32    | <b>324 ± 68*</b>       |
| LA vol. (mm <sup>3</sup> ) | 4.60 ± 0.50 | <b>11.10 ± 0.70***</b> |
| LVPWS (mm)                 | 1.11 ± 0.08 | 0.99 ± 0.07            |
| LVEDD (mm)                 | 3.26 ± 0.13 | <b>4.00 ± 0.20*</b>    |
| FS (%)                     | 49.0 ± 3.60 | 41.0 ± 1.50            |
| IVRT (msec)                | 13.71 ± 0.5 | <b>19.9 ± 1.2**</b>    |
| PAoFV (cm/sec)             | 112.3 ± 7   | 109.0 ± 8              |
| PEV (cm/sec)               | 83 ± 6      | 96 ± 4                 |
| CVR-R (%)                  | 3.8 ± 1.1   | <b>44.8 ± 16.5*</b>    |

HR, heart rate; LA vol, Left Atrial volume; LVPWS, Left Ventricular (LV) end-systolic posterior wall thickness; LVEDD, LV end-diastolic dimension; FS, fractional shortening; IVRT, Isovolumic relaxation time; PAoFV, Peak Aortic Flow Velocity; PEV, Peak Ejection Flow Velocity; CVR-R, Coefficient of Variation of R-R Intervals. Data were analyzed by Student *t*-test. \*, *P* < 0.05; \*\*, *P* < 0.01; \*\*\*, *P* < 0.005 versus WT.
