# Supplementary material for: microRNA-22 Promotes Heart Failure through Coordinate Suppression of PPAR/ERR-Nuclear Hormone Receptor Transcription
Source: PubMed Central journal article supplement (PMC3785418; doi:10.1371/journal.pone.0075882), 2013-09-27
Supplement: pone.0075882.s007.pdf [file pone.0075882.s007.pdf]

Table S2. Genes downregulated in miR-22-transgenic hearts

Down-regulated genes (genes with greater or equal to 1.5-fold repression are shown)

| Symbol        | Description                                                                                                 | FC    | P.Value  | adj.P.Val | Transcript         | 3'UTR_length | 9mers | 8mers | 7mers | 6mers | 9mers_c<br>ons | 8mers_c<br>ons | 7mers_c<br>ons | 6mers_c<br>ons | TS6_PCT | TSC_Context<br>Plus_run | TargetScan_<br>ORF |
|---------------|-------------------------------------------------------------------------------------------------------------|-------|----------|-----------|--------------------|--------------|-------|-------|-------|-------|----------------|----------------|----------------|----------------|---------|-------------------------|--------------------|
| Ano10         | anoctamin 10                                                                                                | -5.11 | 2.12E-08 | 4.82E-06  | ENSMUST00000042546 | 534          | 0     | 0     | 0     | 0     |                |                |                |                |         |                         |                    |
| scf000994.1.0 |                                                                                                             | -4.97 | 3.52E-08 | 6.98E-06  | AK052936           | 224          | 0     | 0     | 0     | 0     |                |                |                |                |         |                         |                    |
| Ces3          | carboxylesterase 3                                                                                          | -4.49 | 5.71E-09 | 2.96E-06  | OTTMUST00000060241 | 187          | 0     | 0     | 0     | 0     |                |                |                |                |         |                         |                    |
| Fhl2          | four and a half LIM domains 2                                                                               | -4.38 | 6.10E-07 | 3.39E-05  | ENSMUST00000006280 | 440          | 0     | 0     | 0     | 1     |                |                |                | 0.682          |         |                         |                    |
| Whrn          | whirlin                                                                                                     | -3.29 | 2.72E-08 | 5.89E-06  | OTTMUST00000000708 | 574          | 0     | 0     | 0     | 0     |                |                |                |                |         |                         |                    |
| Lrtm1         | leucine-rich repeats and transmembrane domains 1                                                            | -2.85 | 1.47E-06 | 5.88E-05  | ENSMUST00000055662 | 126          | 0     | 0     | 0     | 0     |                |                |                |                |         |                         |                    |
| Scn4b         | sodium channel, type IV, beta                                                                               | -2.82 | 1.14E-06 | 5.01E-05  | OTTMUST00000040454 | 3648         | 0     | 0     | 1     | 2     |                |                | -0.13          | -0.117         |         | -0.107                  |                    |
| Rdh1          | 3-hydroxybutyrate dehydrogenase, type 1                                                                     | -2.79 | 6.91E-09 | 3.31E-06  | OTTMUST00000063795 | 1807         | 0     | 0     | 0     | 1     |                |                |                | 0.904          |         |                         |                    |
| Gpr22         | G protein-coupled receptor 22                                                                               | -2.58 | 5.30E-08 | 8.55E-06  | OTTMUST00000054817 | 1844         | 0     | 0     | 0     | 0     |                |                |                | 0.023          |         |                         |                    |
| P2ry1         | purinergic receptor P2Y, G-protein coupled 1                                                                | -2.54 | 7.46E-10 | 1.16E-06  | ENSMUST00000029331 | 2117         | 0     | 0     | 0     | 1     |                |                |                | 1.551          |         |                         |                    |
| Eno3          | enolase 3, beta muscle                                                                                      | -2.51 | 2.27E-06 | 7.93E-05  | OTTMUST00000013691 | 81           | 0     | 0     | 0     | 0     |                |                |                |                |         |                         |                    |
| Pdp2          | pyruvate dehydrogenase phosphatase catalytic subunit 2                                                      | -2.48 | 2.11E-07 | 1.84E-05  | ENSMUST00000059588 | 1717         | 0     | 0     | 1     | 0     |                |                |                | -0.08          |         |                         | -0.095             |
| Acot1         | acyl-CoA thioesterase 1                                                                                     | -2.48 | 2.60E-05 | 0.000412  | ENSMUST00000085210 | 292          | 0     | 0     | 0     | 0     |                |                |                |                |         |                         |                    |
| Apbb1         | amyloid beta (A4) precursor protein-binding, family B, member 1                                             | -2.41 | 2.76E-08 | 5.89E-06  | ENSMUST00000081165 | 397          | 0     | 0     | 0     | 0     |                |                |                |                |         |                         |                    |
| Ky            | kyphoscoliosis peptidase                                                                                    | -2.4  | 3.25E-08 | 6.57E-06  | ENSMUST00000039390 | 3457         | 0     | 0     | 0     | 0     |                |                |                |                |         |                         |                    |
| Igtp          | interferon gamma induced GTPase                                                                             | -2.4  | 0.011    | 0.0348    | OTTMUST00000012730 | 315          | 0     | 0     | 0     | 0     |                |                |                |                |         |                         |                    |
| Cish          | cytokine inducible SH2-containing protein                                                                   | -2.33 | 8.02E-06 | 0.00019   | ENSMUST00000085102 | 1061         | 0     | 0     | 0     | 0     |                |                |                |                |         |                         |                    |
| Pdlim4        | PDZ and LIM domain 4                                                                                        | -2.25 | 5.44E-07 | 3.20E-05  | OTTMUST00000012588 | 221          | 0     | 0     | 0     | 0     |                |                |                |                |         |                         |                    |
| Ppil1         | peptidylprolyl isomerase (cyclophilin)-like 1                                                               | -2.24 | 5.60E-10 | 1.12E-06  | OTTMUST00000071754 | 702          | 0     | 0     | 0     | 0     |                |                |                |                |         |                         |                    |
| Kcnv2         | potassium channel, subfamily K, member 2                                                                    | -2.21 | 7.20E-08 | 9.78E-06  | OTTMUST00000048473 | 3256         | 0     | 1     | 0     | 2     |                |                | 0.155          | 0.12           |         |                         | -0.164             |
| Snrpn         | small nuclear ribonucleoprotein N                                                                           | -2.2  | 3.21E-09 | 2.74E-06  | ENSMUST00000059305 | 738          | 0     | 0     | 0     | 0     |                |                |                |                |         |                         |                    |
| Mvh6          | myosin, heavy polypeptide 6, cardiac muscle, alpha                                                          | -2.2  | 6.08E-06 | 0.000158  | ENSMUST00000081857 | 52           | 0     | 0     | 0     | 0     |                |                |                |                |         |                         |                    |
| Mlxip1        | MLX interacting protein-like family with sequence similarity 78, member A                                   | -2.19 | 2.94E-08 | 6.06E-06  | OTTMUST00000064065 | 1022         | 0     | 0     | 0     | 1     |                |                |                | -0.559         |         |                         |                    |
| Fam78a        | 78, member A                                                                                                | -2.17 | 5.92E-07 | 3.34E-05  | OTTMUST00000031096 | 2378         | 0     | 0     | 0     | 1     |                |                |                | -0.733         |         |                         |                    |
| Tul1          | tubulin tyrosine ligase-like 1                                                                              | -2.16 | 9.59E-08 | 1.16E-05  | OTTMUST00000057014 | 412          | 0     | 0     | 0     | 0     |                |                |                |                |         |                         |                    |
| Egfbp2        | epidermal growth factor binding protein type B                                                              | -2.14 | 1.92E-08 | 4.53E-06  | ENSMUST00000048945 | 41           | 0     | 0     | 0     | 0     |                |                |                |                |         |                         |                    |
| Ganbp1        | gametogenin binding protein 1                                                                               | -2.13 | 6.83E-08 | 9.55E-06  | OTTMUST00000076818 | 212          | 0     | 0     | 0     | 0     |                |                |                |                |         |                         |                    |
| Dhrs11        | dehydrogenase/reductase (SDR family) member 11                                                              | -2.11 | 3.87E-08 | 7.12E-06  | OTTMUST00000001927 | 404          | 0     | 0     | 0     | 1     |                |                |                | 0.312          |         |                         |                    |
| Fkbp4         | FK506 binding protein 4                                                                                     | -2.11 | 1.80E-06 | 6.72E-05  | OTTMUST00000060562 | 673          | 0     | 0     | 0     | 1     |                |                |                | 0.574          |         |                         |                    |
| Gpc1          | glypican 1                                                                                                  | -2.11 | 9.25E-06 | 0.000211  | ENSMUST00000045970 | 1634         | 0     | 2     | 0     | 2     |                |                | -0.346         | -0.863         |         |                         | -0.212             |
| Dci           | dodecenoyl-Coenzyme A delta isomerase (3,2 trans-enoyl-Coenzyme A isomerase)                                | -2.1  | 1.77E-06 | 6.64E-05  | ENSMUST00000024946 | 201          | 0     | 0     | 0     | 0     |                |                |                |                |         |                         |                    |
| Cd74          | CD74 antigen (invariant polypeptide of major histocompatibility complex, class II antigen-associated)       | -2.1  | 0.0042   | 0.0165    | ENSMUST00000050487 | 484          | 0     | 0     | 0     | 0     |                |                |                |                |         |                         |                    |
| Ceb1          | cysteine conjugate-beta lyase 1                                                                             | -2.09 | 1.36E-08 | 3.80E-06  | OTTMUST00000040651 | 380          | 0     | 0     | 0     | 0     |                |                |                |                |         |                         |                    |
| Maob          | monoamine oxidase B                                                                                         | -2.08 | 9.63E-06 | 0.000217  | OTTMUST00000041060 | 757          | 0     | 0     | 0     | 0     |                |                |                |                |         |                         |                    |
| Rpl3l         | ribosomal protein L3-like                                                                                   | -2.07 | 3.96E-05 | 0.000537  | ENSMUST00000045186 | 89           | 0     | 0     | 0     | 0     |                |                |                |                |         |                         |                    |
| Dgat2         | diacylglycerol O-acyltransferase 2                                                                          | -2.06 | 6.31E-08 | 9.55E-06  | ENSMUST00000033001 | 888          | 0     | 0     | 0     | 0     |                |                |                |                |         |                         |                    |
| Cyp2b10       | cytochrome P450, family 2, subfamily b, polypeptide 10                                                      | -2.06 | 3.10E-05 | 0.000463  | OTTMUST00000067194 | 375          | 0     | 0     | 0     | 0     |                |                |                |                |         |                         |                    |
| Foxred1       | FOXO-dependent oxidoreductase domain containing 1                                                           | -2.04 | 4.69E-08 | 7.87E-06  | OTTMUST00000086277 | 661          | 0     | 1     | 0     | 0     |                |                | -0.502         |                |         |                         | -0.289             |
| Fncd5         | fibronectin type III domain containing 5                                                                    | -2.04 | 6.19E-07 | 3.42E-05  | OTTMUST00000022138 | 2053         | 0     | 0     | 1     | 3     |                |                | 0.031          | 2.112          |         |                         | -0.076             |
| Gzmm          | granzyme M (lymphocyte met-ase 1)                                                                           | -2.04 | 9.09E-07 | 4.28E-05  | OTTMUST00000069005 | 101          | 0     | 0     | 0     | 0     |                |                |                |                |         |                         |                    |
| Ptp4a3        | protein tyrosine phosphatase 4a3                                                                            | -2.01 | 1.13E-08 | 3.41E-06  | ENSMUST00000053232 | 312          | 0     | 0     | 0     | 0     |                |                |                |                |         |                         |                    |
| Tmem25        | transmembrane protein 25                                                                                    | -2    | 2.02E-07 | 1.81E-05  | OTTMUST00000040541 | 1199         | 0     | 0     | 0     | 1     |                |                |                | 0.348          |         |                         |                    |
| LOC641240     | histocompatibility antigen, A-D                                                                             | -2    | 0.0132   | 0.0401    | XM 918601          | 311          | 0     | 0     | 0     | 0     |                |                |                |                |         |                         |                    |
| Tbc1d10c      | TBC1 domain family, member 10c                                                                              | -1.99 | 3.70E-07 | 2.49E-05  | ENSMUST00000045864 | 368          | 0     | 0     | 0     | 0     |                |                |                |                |         |                         |                    |
| A2bp1         | ataxin 2 binding protein 1                                                                                  | -1.96 | 2.11E-05 | 0.000356  | ENSMUST00000115841 | 1697         | 0     | 0     | 0     | 0     |                |                |                |                |         |                         |                    |
| Aldh5a1       | aldehyde dehydrogenase family 5, subfamily A1                                                               | -1.95 | 5.33E-08 | 8.55E-06  | OTTMUST00000001200 | 3982         | 0     | 0     | 1     | 3     |                |                | 1.359          | -1.528         |         |                         | -0.15              |
| Tmem82        | transmembrane protein 82                                                                                    | -1.95 | 3.08E-07 | 2.22E-05  | OTTMUST00000024087 | 348          | 0     | 0     | 0     | 0     |                |                |                |                |         |                         |                    |
| Dbh           | dopamine beta hydroxylase                                                                                   | -1.93 | 6.68E-06 | 0.000169  | OTTMUST00000027810 | 400          | 0     | 0     | 0     | 0     |                |                |                |                |         |                         |                    |
| St3gal5       | ST3 beta-galactoside alpha-2,3-sialyltransferase 5                                                          | -1.88 | 7.14E-07 | 3.67E-05  | ENSMUST00000069994 | 900          | 0     | 1     | 2     | 2     |                |                | -0.798         | 1.988          | 0.101   |                         | -0.502             |
| H2-T22        | histocompatibility 2, T region locus 22                                                                     | -1.88 | 0.0043   | 0.0168    | OTTMUST00000035506 | 344          | 0     | 0     | 0     | 0     |                |                |                |                |         |                         |                    |
| H2-Ab1        | histocompatibility 2, class II antigen A, beta 1                                                            | -1.87 | 0.0107   | 0.0341    | ENSMUST00000040828 | 302          | 0     | 0     | 0     | 0     |                |                |                |                |         |                         |                    |
| Mtr           | 5-methyltetrahydrofolate-homocysteine methyltransferase                                                     | -1.86 | 3.15E-06 | 0.000101  | ENSMUST00000099856 | 469          | 0     | 0     | 0     | 0     |                |                |                |                |         |                         |                    |
| Ckm           | creatine kinase, muscle acetyl-Coenzyme A acyltransferase 2 (mitochondrial 3-oxoacetyl-Coenzyme A thiolase) | -1.85 | 1.49E-08 | 3.95E-06  | ENSMUST00000003643 | 197          | 0     | 0     | 0     | 0     |                |                |                |                |         |                         |                    |
| Acaa2         | Y box protein 2                                                                                             | -1.84 | 4.11E-07 | 2.70E-05  | OTTMUST00000013542 | 414          | 0     | 0     | 0     | 0     |                |                |                |                |         |                         |                    |
| Tmem50b       | transmembrane protein 50B                                                                                   | -1.84 | 4.25E-07 | 2.76E-05  | OTTMUST00000047595 | 1610         | 0     | 1     | 0     | 1     |                |                | 1.598          | 1.216          |         |                         | -0.137             |
| Fbp2          | fructose biphosphatase 2                                                                                    | -1.84 | 0.000713 | 0.00432   | ENSMUST00000021907 | 202          | 0     | 0     | 0     | 0     |                |                |                |                |         |                         |                    |
| Dnaia3        | DnaJ (Hsp40) homolog, subfamily A, member 3                                                                 | -1.83 | 1.43E-08 | 3.90E-06  | OTTMUST00000059741 | 1141         | 0     | 1     | 0     | 2     |                |                | -0.169         | 0.983          |         |                         | -0.201             |
| Pcd11         | Purkinje cell protein 4-like 1                                                                              | -1.83 | 7.06E-06 | 0.000176  | OTTMUST00000051423 | 1121         | 0     | 0     | 0     | 1     |                |                |                | 0.505          |         |                         |                    |
| Bcl11b        | B-cell leukemia/lymphoma 11B                                                                                | -1.82 | 4.36E-07 | 2.77E-05  | OTTMUST00000046516 | 4997         | 0     | 0     | 0     | 1     |                |                |                | 0.15           |         |                         |                    |
| Mmp15         | matrix metalloproteinase 15                                                                                 | -1.82 | 3.43E-05 | 0.000491  | OTTMUST00000067975 | 1773         | 0     | 0     | 0     | 2     |                |                |                | 1              |         |                         |                    |
| Mrps9         | mitochondrial ribosomal protein S9                                                                          | -1.81 | 3.56E-07 | 2.43E-05  | ENSMUST00000057208 | 184          | 0     | 0     | 0     | 0     |                |                |                |                |         |                         |                    |
| 1810006K21R1k | RIKEN cDNA 1810006K21 gene                                                                                  | -1.8  | 8.94E-09 | 3.31E-06  | OTTMUST00000086010 | 118          | 0     | 1     | 0     | 0     |                |                | 0.256          |                |         |                         | -0.232             |
| Timm44        | translocase of inner mitochondrial membrane 44                                                              | -1.79 | 8.62E-08 | 1.11E-05  | OTTMUST00000052863 | 405          | 0     | 1     | 1     | 0     |                |                | -1.767         | -1.15          |         |                         | -0.529             |

| Symbol        | Description                                                            | FC    | P.Value  | adj.P.Val | Transcript          | 3'UTR_length | 8mers | 8mers | 7mers | 6mers | 9mers_c<br>ons | 8mers_c<br>ons | 7mers_c<br>ons | 6mers_c<br>ons | TS6_PCT | TSC_Context<br>Plus_run | TargetScan_<br>ORF |
|---------------|------------------------------------------------------------------------|-------|----------|-----------|---------------------|--------------|-------|-------|-------|-------|----------------|----------------|----------------|----------------|---------|-------------------------|--------------------|
| Gat           | glutamic pyruvic transaminase, soluble                                 | -1.79 | 1.10E-05 | 0.000231  | ENSMUST00000023203  | 164          | 0     | 0     | 0     | 0     | 0              | 0              | 0              | 0              |         |                         |                    |
| H2-D1         | histocompatibility 2, D region locus 1                                 | -1.79 | 0.00268  | 0.0117    | ENSMUST00000087173  | 625          | 0     | 0     | 0     | 2     |                |                |                |                |         |                         |                    |
| Hcn2          | hyperpolarization-activated, cyclic nucleotide-gated K+ 2              | -1.78 | 2.07E-07 | 1.84E-05  | OTTMUST00000068991  | 568          | 0     | 0     | 0     | 0     |                |                |                |                |         |                         |                    |
| Mrops12       | mitochondrial ribosomal protein S12                                    | -1.78 | 4.32E-07 | 2.76E-05  | ENSMUST00000056078  | 227          | 0     | 0     | 0     | 0     |                |                |                |                |         |                         |                    |
| Rnf207        | ring finger protein 207                                                | -1.78 | 0.00014  | 0.00131   | OTTMUST00000024276  | 408          | 0     | 0     | 0     | 0     |                |                |                |                |         |                         |                    |
| Rmnd1         | required for meiotic nuclear division 1 homolog (S. cerevisiae)        | -1.77 | 3.36E-09 | 2.74E-06  | OTTMUST00000076631  | 1554         | 0     | 0     | 0     | 1     |                |                |                |                |         |                         |                    |
| Pdss1         | prenyl (solanesyl) diphosphate synthase, subunit 1                     | -1.77 | 9.71E-08 | 1.16E-05  | OTTMUST00000040189  | 303          | 1     | 0     | 0     | 0     | 2.166          |                |                |                |         | -0.597                  |                    |
| Nudt4         | nudix (nucleoside diphosphate linked moiety X)-type motif 4            | -1.76 | 4.08E-09 | 2.78E-06  | ENSMUST00000020217  | 1999         | 0     | 1     | 0     | 1     | 1.081          |                | 0.475          |                |         | -0.448                  |                    |
| Dpy30         | dpy-30 homolog (C. elegans)                                            | -1.76 | 5.57E-07 | 3.23E-05  | ENSMUST000000112571 | 271          | 0     | 1     | 0     | 0     |                |                |                |                |         |                         | -0.31              |
| Naprt1        | nicotinate phosphoribosyltransferase domain containing 1               | -1.76 | 2.71E-06 | 9.05E-05  | ENSMUST00000023237  | 31           | 0     | 0     | 0     | 0     |                |                |                |                |         |                         |                    |
| Acsl6         | acyl-CoA synthetase long-chain family member 6                         | -1.76 | 2.18E-05 | 0.000365  | OTTMUST00000012611  | 3559         | 0     | 0     | 0     | 2     |                |                | 0.865          |                |         |                         |                    |
| Tmem223       | transmembrane protein 223                                              | -1.76 | 0.000157 | 0.00143   | ENSMUST00000010248  | 135          | 0     | 0     | 0     | 0     |                |                |                |                |         |                         |                    |
| Acadvl        | acyl-Coenzyme A dehydrogenase, very long chain                         | -1.75 | 2.77E-06 | 9.17E-05  | OTTMUST00000013531  | 113          | 0     | 0     | 0     | 0     |                |                |                |                |         |                         |                    |
| Plin5         | perilipin 5                                                            | -1.75 | 2.02E-05 | 0.000347  | ENSMUST00000019808  | 428          | 0     | 0     | 0     | 0     |                |                |                |                |         |                         |                    |
| Retnla        | resistin like alpha                                                    | -1.74 | 5.32E-05 | 0.000656  | ENSMUST00000023329  | 160          | 0     | 0     | 0     | 0     |                |                |                |                |         |                         |                    |
| Slc46a3       | solute carrier family 46, member 3                                     | -1.73 | 6.80E-08 | 9.55E-06  | OTTMUST00000012750  | 696          | 0     | 0     | 0     | 0     |                |                |                |                |         |                         |                    |
| BC022713      | cDNA sequence BC022713                                                 | -1.73 | 1.30E-07 | 1.43E-05  | NM_177761           |              |       |       |       |       |                |                |                |                |         |                         |                    |
| Nat5          | N-acetyltransferase 5 (ARD1 homolog, S. cerevisiae)                    | -1.73 | 1.95E-07 | 1.80E-05  | OTTMUST00000009059  | 536          | 1     | 0     | 0     | 0     | 0.592          |                |                |                |         |                         | -0.54              |
| Car14         | carbonic anhydrase 14                                                  | -1.73 | 1.98E-07 | 1.81E-05  | OTTMUST00000052679  | 378          | 0     | 0     | 0     | 0     |                |                |                |                |         |                         |                    |
| Macro1        | MACRO domain containing 1                                              | -1.73 | 4.28E-06 | 0.000122  | ENSMUST00000040261  | 175          | 0     | 0     | 0     | 0     |                |                |                |                |         |                         |                    |
| Josd2         | Josephin domain containing 2                                           | -1.72 | 3.52E-09 | 2.74E-06  | OTTMUST00000071936  | 138          | 0     | 0     | 0     | 1     |                |                | 0.11           |                |         |                         |                    |
| Smtn          | smoothelin                                                             | -1.72 | 4.35E-05 | 0.00058   | OTTMUST00000011165  | 325          | 0     | 0     | 0     | 0     |                |                |                |                |         |                         |                    |
| Pbbp          | pro-platelet basic protein                                             | -1.72 | 0.00466  | 0.0178    | ENSMUST00000031319  | 653          | 0     | 0     | 0     | 0     |                |                |                |                |         |                         |                    |
| Tesc          | tescalcin                                                              | -1.71 | 1.61E-07 | 1.66E-05  | OTTMUST00000050483  | 199          | 0     | 0     | 0     | 0     |                |                |                |                |         |                         |                    |
| Dhrs7c        | dehydrogenase/reductase (SDR family) member 7C                         | -1.71 | 1.38E-06 | 5.70E-05  | OTTMUST00000013210  | 52           | 0     | 0     | 0     | 0     |                |                |                |                |         |                         |                    |
| Gck           | glucokinase                                                            | -1.71 | 2.54E-06 | 8.64E-05  | OTTMUST00000014370  | 850          | 0     | 1     | 0     | 1     | -0.554         |                | -1.769         |                |         |                         | -0.243             |
| Adhfe1        | alcohol dehydrogenase, iron containing, 1                              | -1.7  | 9.46E-08 | 1.16E-05  | OTTMUST00000053148  | 1696         | 1     | 0     | 0     | 0     |                |                |                |                |         |                         | -0.404             |
| Rasd2         | RASD family, member 2                                                  | -1.7  | 1.44E-07 | 1.54E-05  | OTTMUST00000085986  | 1865         | 0     | 0     | 0     | 2     |                |                |                |                |         |                         |                    |
| Gm14492       | predicted gene 14492                                                   | -1.7  | 8.45E-07 | 4.16E-05  | OTTMUST00000040867  | 732          | 0     | 0     | 0     | 0     |                |                |                |                |         |                         |                    |
| Fitm1         | fat storage-inducing transmembrane protein 1                           | -1.7  | 3.10E-05 | 0.000463  | ENSMUST00000022826  | 25           | 0     | 0     | 0     | 0     |                |                |                |                |         |                         |                    |
| Gm10499       | predicted gene 10499                                                   | -1.7  | 0.00212  | 0.0098    | ENSMUST00000064686  | 211          | 0     | 0     | 0     | 1     |                |                |                |                |         |                         |                    |
| 2410015M20R1k | RIKEN cDNA 2410015M20 gene                                             | -1.69 | 1.70E-06 | 6.44E-05  | ENSMUST00000052832  | 122          | 0     | 0     | 1     | 0     |                |                |                |                |         |                         | -0.199             |
| 2810416G20R1k | RIKEN cDNA 2810416G20 gene                                             | -1.69 | 3.98E-06 | 0.000118  | ENSMUST00000057404  |              |       |       |       |       |                |                |                |                |         |                         |                    |
| Cav3          | caveolin 3                                                             | -1.69 | 2.04E-05 | 0.000348  | ENSMUST00000075477  | 392          | 1     | 0     | 0     | 0     | 1.92           |                |                |                |         |                         | -0.463             |
| Inmt          | indolethylamine N-methyltransferase                                    | -1.69 | 0.00207  | 0.00961   | OTTMUST00000066722  | 222          | 0     | 0     | 0     | 0     |                |                |                |                |         |                         |                    |
| Ech1          | enoyl coenzyme A hydratase 1, peroxisomal                              | -1.68 | 0.000468 | 0.00315   | OTTMUST00000072226  | 139          | 0     | 0     | 0     | 0     |                |                |                |                |         |                         |                    |
| Tnfrsf8       | tumor necrosis factor, alpha-induced protein 8                         | -1.67 | 9.59E-09 | 3.31E-06  | OTTMUST00000083080  | 1017         | 0     | 0     | 0     | 0     |                |                |                |                |         |                         |                    |
| Dhx30         | DEAH (Asp-Glu-Ala-His) box polypeptide 30                              | -1.66 | 1.77E-08 | 4.38E-06  | OTTMUST00000086417  | 73           | 0     | 0     | 0     | 0     |                |                |                |                |         |                         |                    |
| 2610528E23R1k | RIKEN cDNA 2610528E23 gene                                             | -1.66 | 1.68E-06 | 6.42E-05  | ENSMUST00000023430  | 199          | 0     | 0     | 0     | 0     |                |                |                |                |         |                         |                    |
| Tom6          | translocase of outer mitochondrial membrane 6 homolog (yeast)          | -1.66 | 5.92E-06 | 0.000155  | OTTMUST00000044344  | 367          | 0     | 1     | 0     | 0     | 2.01           |                |                |                |         |                         | -0.249             |
| Snai3         | snail homolog 3 (Drosophila)                                           | -1.66 | 0.000258 | 0.00205   | ENSMUST00000006762  | 645          | 0     | 0     | 1     | 1     |                |                | -0.47          |                |         |                         | -0.164             |
| Cnpep1        | Vcalcin-like phosphoesterase domain containing 1                       | -1.65 | 6.53E-08 | 9.55E-06  | OTTMUST00000053605  | 1636         | 0     | 0     | 0     | 3     |                |                | 0.624          |                |         |                         |                    |
| Slc25a33      | solute carrier family 25, member 33                                    | -1.65 | 3.46E-06 | 0.000108  | OTTMUST00000023896  | 702          | 0     | 0     | 0     | 0     |                |                |                |                |         |                         |                    |
| Pim3          | proviral integration site 3                                            | -1.65 | 2.09E-05 | 0.000354  | ENSMUST00000042818  | 956          | 0     | 0     | 0     | 1     |                |                |                |                |         |                         | -0.55              |
| Lpin1         | lipin 1                                                                | -1.65 | 5.31E-05 | 0.000656  | ENSMUST00000048538  | 1777         | 0     | 0     | 0     | 1     |                |                |                |                |         |                         | -0.711             |
| Slamf9        | SLAM family member 9                                                   | -1.65 | 0.000162 | 0.00146   | OTTMUST00000050810  | 316          | 0     | 0     | 0     | 0     |                |                |                |                |         |                         |                    |
| Cenpv         | centromere protein V                                                   | -1.64 | 3.80E-08 | 7.12E-06  | OTTMUST00000013042  | 217          | 0     | 1     | 0     | 0     |                |                |                |                |         |                         | -0.302             |
| Dpy30         | dpy-30 homolog (C. elegans)                                            | -1.63 | 1.32E-07 | 1.43E-05  | NM_024428           | 278          | 0     | 1     | 0     | 0     |                |                |                |                |         |                         | -0.31              |
| Crat          | carnitine acetyltransferase                                            | -1.63 | 2.71E-07 | 2.11E-05  | OTTMUST00000040750  | 2107         | 0     | 0     | 0     | 1     |                |                |                |                |         |                         | -0.348             |
| Lrrc14b       | leucine rich repeat containing 14B                                     | -1.63 | 4.05E-07 | 2.67E-05  | ENSMUST00000022064  | 1173         | 0     | 0     | 0     | 1     |                |                |                |                |         |                         |                    |
| Echs1         | enoyl Coenzyme A hydratase, short chain, 1, mitochondrial              | -1.63 | 5.32E-07 | 3.19E-05  | OTTMUST00000067462  | 602          | 1     | 0     | 0     | 1     | -2.147         |                |                | -1.104         |         |                         |                    |
| Mrpl3         | mitochondrial ribosomal protein L3                                     | -1.63 | 7.08E-07 | 3.66E-05  | OTTMUST00000057317  | 317          | 0     | 0     | 0     | 0     |                |                |                |                |         |                         |                    |
| Kcni2         | Kv channel-interacting protein 2                                       | -1.63 | 1.29E-05 | 0.000254  | ENSMUST00000026247  | 1324         | 0     | 0     | 0     | 0     |                |                |                |                |         |                         |                    |
| Cs            | citrate synthase                                                       | -1.63 | 3.45E-05 | 0.000493  | ENSMUST00000005826  | 1346         | 0     | 0     | 0     | 1     |                |                |                |                |         |                         | 0.31               |
| Cd11          | chemokine (C-C motif) ligand 11                                        | -1.63 | 6.48E-05 | 0.000749  | OTTMUST00000001670  | 644          | 0     | 0     | 0     | 1     |                |                |                |                |         |                         |                    |
| Mgll          | monoglyceride lipase                                                   | -1.62 | 6.26E-07 | 3.42E-05  | OTTMUST00000058395  | 2584         | 0     | 0     | 0     | 2     |                |                |                |                |         |                         | 1.42               |
| Bdnf          | brain derived neurotrophic factor                                      | -1.62 | 7.29E-06 | 0.00018   | OTTMUST00000035871  | 2895         | 0     | 0     | 0     | 1     |                |                |                |                |         |                         | 1.437              |
| Tbrg4         | transforming growth factor beta regulated gene 4                       | -1.62 | 4.62E-05 | 0.000602  | OTTMUST000000011462 | 190          | 0     | 0     | 0     | 0     |                |                |                |                |         |                         |                    |
| LOC381792     |                                                                        | -1.62 | 4.93E-05 | 0.000628  | XM_358653           |              |       |       |       |       |                |                |                |                |         |                         |                    |
| Acy1          | aminoacylase 1                                                         | -1.61 | 1.82E-08 | 4.40E-06  | ENSMUST00000024031  | 90           | 0     | 0     | 0     | 0     |                |                |                |                |         |                         |                    |
| Uacrc1        | ubiquinol-cytochrome c reductase core protein 1                        | -1.61 | 2.89E-07 | 2.13E-05  | ENSMUST00000026743  | 122          | 0     | 0     | 0     | 0     |                |                |                |                |         |                         |                    |
| Pparoc1b      | peroxisome proliferative activated receptor, gamma, coactivator 1 beta | -1.61 | 1.71E-06 | 6.44E-05  | OTTMUST00000058693  | 547          | 0     | 0     | 0     | 0     |                |                |                |                |         |                         |                    |
| Rtn4ip1       | reticulon 4 interacting protein 1                                      | -1.61 | 5.77E-06 | 0.000154  | OTTMUST00000055533  | 1334         | 0     | 0     | 0     | 0     |                |                |                |                |         |                         |                    |
| Tmem86a       | transmembrane protein 86A                                              | -1.6  | 1.17E-06 | 5.06E-05  | ENSMUST00000010451  | 892          | 0     | 0     | 0     | 0     |                |                |                |                |         |                         |                    |

| Symbol                 | Description                                                                                              | FC    | P.Value  | adj.P.Val | Transcript          | 3'UTR length | 8mers | 8mers | 7mers | 6mers | 9mers_c<br>ons | 8mers_c<br>ons | 7mers_c<br>ons | 6mers_c<br>ons | TS6 PCT | TSC_Context<br>Plus rerun | TargetScan_<br>ORF |
|------------------------|----------------------------------------------------------------------------------------------------------|-------|----------|-----------|---------------------|--------------|-------|-------|-------|-------|----------------|----------------|----------------|----------------|---------|---------------------------|--------------------|
| Rvr2                   | ryanodine receptor 2, cardiac                                                                            | -1.6  | 1.42E-06 | 5.86E-05  | ENSMUST00000021750  | 1413         | 0     | 0     | 0     | 0     | 1              |                |                | 0.72           |         |                           |                    |
| LOC227393              |                                                                                                          | -1.6  | 3.92E-06 | 0.00118   | XM_129965           | 261          | 0     | 0     | 0     | 0     |                |                |                |                |         |                           |                    |
| Lgals4                 | lectin, galactose binding, soluble 4                                                                     | -1.6  | 3.19E-05 | 0.00047   | OTTMUST00000054398  | 70           | 0     | 0     | 0     | 0     |                |                |                |                |         |                           |                    |
| Aldh1l2                | aldehyde dehydrogenase 1 family, member L2                                                               | -1.6  | 0.000138 | 0.00129   | OTTMUST00000061092  | 3129         | 0     | 1     | 0     | 1     |                | -0.748         |                |                |         | -0.197                    |                    |
| 1700034H14Ri<br>k      | RIKEN cDNA 1700034H14 gene                                                                               | -1.59 | 9.77E-09 | 3.31E-06  | ENSMUST00000025547  | 353          | 0     | 0     | 0     | 0     |                |                |                |                |         |                           |                    |
| Ndufa8                 | NADH dehydrogenase (ubiquinone) 1 alpha subcomplex, 8                                                    | -1.59 | 4.43E-07 | 2.79E-05  | OTTMUST00000028784  | 178          | 0     | 0     | 0     | 0     |                |                |                |                |         |                           |                    |
| Tmem65                 | transmembrane protein 65                                                                                 | -1.59 | 6.00E-06 | 0.000156  | OTTMUST00000049620  | 2640         | 0     | 0     | 0     | 1     |                |                |                | -0.474         |         |                           |                    |
| Pdhh                   | pyruvate dehydrogenase (lipoamide) beta                                                                  | -1.59 | 2.32E-05 | 0.000379  | ENSMUST00000022268  | 338          | 0     | 0     | 0     | 0     |                |                |                |                |         |                           |                    |
| Pfkfb2                 | 6-phosphofructo-2-kinase/fructose-2,6-biphosphatase 2                                                    | -1.59 | 0.000107 | 0.00108   | ENSMUST00000066863  | 2835         | 0     | 0     | 0     | 1     |                |                |                |                |         | 0.048                     |                    |
| Mrp147                 | mitochondrial ribosomal protein L47                                                                      | -1.58 | 8.73E-06 | 0.000202  | OTTMUST00000069652  | 2197         | 0     | 0     | 0     | 1     |                |                |                |                |         | 0.305                     |                    |
| Tmem143                | transmembrane protein 143                                                                                | -1.58 | 1.16E-05 | 0.000238  | OTTMUST00000053174  | 782          | 0     | 0     | 0     | 2     |                |                |                |                |         | 0.616                     |                    |
| Camk2b                 | calcium/calmodulin-dependent protein kinase II, beta                                                     | -1.58 | 0.000101 | 0.00103   | OTTMUST00000011419  | 2184         | 0     | 0     | 0     | 1     |                |                |                |                |         | -0.319                    |                    |
| Tnks2                  | tankyrase, TRF1-interacting ankyrin-related ADP-ribose polymerase 2                                      | -1.58 | 0.00019  | 0.00164   | XM_917270           | 2696         | 0     | 1     | 0     | 1     |                |                |                |                |         |                           | -0.163             |
| Sbk1                   | SH3-binding kinase 1                                                                                     | -1.57 | 1.77E-08 | 4.38E-06  | ENSMUST00000056028  | 2342         | 0     | 1     | 0     | 2     |                | 0.311          |                | -0.278         |         |                           | -0.101             |
| Mrp13                  | mitochondrial ribosomal protein L3                                                                       | -1.57 | 1.95E-08 | 4.53E-06  | OTTMUST00000057319  | 1242         | 0     | 0     | 0     | 1     |                |                |                |                |         |                           |                    |
| Oadh                   | oxoglutarate dehydrogenase (lipoamide)                                                                   | -1.57 | 0.00016  | 0.00144   | OTTMUST00000001534  | 968          | 0     | 1     | 0     | 1     |                | -1.118         |                | -2.056         |         |                           | -0.169             |
| Pfkfb2                 | pyruvate kinase, muscle                                                                                  | -1.56 | 8.37E-09 | 3.31E-06  | ENSMUST00000034834  | 538          | 0     | 0     | 0     | 2     |                |                |                |                |         | 0.686                     |                    |
| Idh1                   | isocitrate dehydrogenase 1 (NADP+), soluble                                                              | -1.56 | 1.65E-07 | 1.67E-05  | OTTMUST00000052006  | 849          | 0     | 0     | 0     | 0     |                |                |                |                |         |                           |                    |
| Ank                    | progressive ankylosis                                                                                    | -1.56 | 1.99E-06 | 7.17E-05  | OTTMUST00000065059  | 1692         | 0     | 0     | 0     | 1     |                |                |                |                |         | 0.369                     |                    |
| Tmod4                  | tropomodulin 4                                                                                           | -1.55 | 9.95E-05 | 0.00102   | OTTMUST00000047077  | 99           | 0     | 0     | 0     | 0     |                |                |                |                |         |                           |                    |
| Slc4a3                 | solute carrier family 4 (anion exchanger), member 3                                                      | -1.54 | 5.25E-09 | 2.96E-06  | OTTMUST00000046376  | 3282         | 0     | 0     | 0     | 0     |                |                |                |                |         |                           |                    |
| Prndh                  | proline dehydrogenase                                                                                    | -1.54 | 1.57E-06 | 6.10E-05  | OTTMUST00000069796  | 450          | 0     | 0     | 0     | 1     |                |                |                |                |         |                           |                    |
| Fundc1                 | FUN14 domain containing 1                                                                                | -1.54 | 4.52E-06 | 0.000127  | OTTMUST00000041098  | 1370         | 0     | 0     | 1     | 1     |                |                |                | -1.26          |         |                           | -0.189             |
| Gm766                  | predicted gene 766                                                                                       | -1.54 | 2.89E-05 | 0.000444  | OTTMUST00000053388  |              |       |       |       |       |                |                |                |                |         |                           |                    |
| Cd74                   | CD74 antigen (invariant polypeptide of major histocompatibility complex, class II antigen-associated)    | -1.54 | 0.000924 | 0.00528   | ENSMUST00000097563  | 484          | 0     | 0     | 0     | 0     |                |                |                |                |         |                           |                    |
| Atp5f1                 | ATP synthase, H+ transporting, mitochondrial F0 complex, subunit F                                       | -1.53 | 1.11E-06 | 4.92E-05  | OTTMUST00000062160  | 92           | 0     | 0     | 0     | 0     |                |                |                |                |         |                           |                    |
| A2bp1                  | ataxin 2 binding protein 1                                                                               | -1.53 | 4.16E-06 | 0.000121  | ENSMUST00000092375  | 274          | 0     | 0     | 0     | 0     |                |                |                |                |         |                           |                    |
| 1300018118Ri<br>k      | RIKEN cDNA 1300018118 gene                                                                               | -1.53 | 4.28E-06 | 0.000122  | OTTMUST00000049660  | 354          | 0     | 0     | 0     | 1     |                |                |                |                |         | -1.035                    |                    |
| Rama                   | RGM domain family, member A                                                                              | -1.53 | 5.44E-06 | 0.000147  | OTTMUST00000077776  | 1866         | 0     | 0     | 1     | 4     |                |                |                | 0.106          |         |                           | -0.058             |
| ENSMUSG0000<br>0068790 | predicted gene, ENSMUSG00000068790                                                                       | -1.53 | 1.29E-05 | 0.000254  | ENSMUST000000112764 | 298          | 0     | 0     | 0     | 0     |                |                |                |                |         |                           |                    |
| Gpcpd1                 | glycerophosphocholine phosphodiesterase GDE1 homolog (S. cerevisiae)                                     | -1.53 | 0.000183 | 0.00159   | OTTMUST00000037199  | 1471         | 0     | 0     | 0     | 0     |                |                |                |                |         |                           |                    |
| Veefa                  | vascular endothelial growth factor A                                                                     | -1.53 | 0.000642 | 0.00398   | OTTMUST00000039102  | 1865         | 0     | 0     | 0     | 0     |                |                |                |                |         |                           |                    |
| Afg3l1                 | AFG3(ATPase family gene 3)-like 1 (yeast)                                                                | -1.52 | 8.90E-07 | 4.28E-05  | OTTMUST00000076944  | 1850         | 0     | 0     | 0     | 1     |                |                |                |                |         |                           |                    |
| Lrrpprc                | leucine-rich PPR-motif containing                                                                        | -1.52 | 1.21E-06 | 5.21E-05  | OTTMUST00000076447  | 169          | 0     | 0     | 0     | 0     |                |                |                |                |         |                           |                    |
| Adams2                 | a disintegrin-like and metalloprotease (repolysin type) with thrombospondin type 1 motif, 7              | -1.52 | 1.45E-06 | 5.88E-05  | OTTMUST00000063704  | 231          | 0     | 0     | 0     | 0     |                |                |                |                |         |                           |                    |
| Pxmp2                  | peroxisomal membrane protein 2                                                                           | -1.52 | 6.14E-06 | 0.000159  | OTTMUST00000064832  | 278          | 0     | 0     | 0     | 1     |                |                |                |                |         | -0.532                    |                    |
| Fyco1                  | FYVE and coiled-coil domain containing 1                                                                 | -1.52 | 1.58E-05 | 0.000293  | ENSMUST00000084715  | 3164         | 0     | 0     | 0     | 1     |                |                |                |                |         | -0.942                    |                    |
| Pofia1                 | protein tyrosine phosphatase, receptor type, f polypeptide (PTRF), interacting protein (liprin), alpha 1 | -1.52 | 3.02E-05 | 0.000457  | ENSMUST00000093967  | 1198         | 0     | 0     | 0     | 1     |                |                |                |                |         |                           |                    |
| Gm3411                 | predicted gene 3411                                                                                      | -1.52 | 5.50E-05 | 0.000673  | ENSMUST00000090647  | 746          | 0     | 0     | 0     | 0     |                |                |                |                |         |                           |                    |
| Retsat                 | retinol saturase (all trans retinol 13,14 reductase)                                                     | -1.52 | 0.000108 | 0.00108   | OTTMUST00000066600  | 1033         | 0     | 0     | 0     | 0     |                |                |                |                |         |                           |                    |
| Atp5q1                 | ATP synthase, H+ transporting, mitochondrial F0 complex, subunit c (subunit 9), isoform 1                | -1.51 | 1.01E-08 | 3.31E-06  | OTTMUST00000014195  | 4252         | 0     | 0     | 1     | 1     |                |                |                |                |         |                           | -0.163             |
| Tmnau1ap               | tRNA selenocysteine 1 associated protein 1                                                               | -1.51 | 1.85E-06 | 6.78E-05  | OTTMUST00000021958  | 107          | 0     | 0     | 0     | 0     |                |                |                |                |         |                           |                    |
| Mta1                   | mitochondrial GTPase 1 homolog (S. cerevisiae)                                                           | -1.51 | 1.94E-06 | 7.04E-05  | OTTMUST00000072052  | 513          | 0     | 0     | 0     | 1     |                |                |                |                |         |                           |                    |
| Ipo13                  | importin 13                                                                                              | -1.51 | 3.12E-06 | 1.00E-04  | OTTMUST00000019617  | 75           | 0     | 0     | 0     | 0     |                |                |                |                |         |                           |                    |
| Gstk1                  | glutathione S-transferase kappa 1                                                                        | -1.51 | 5.88E-06 | 0.000155  | ENSMUST00000031897  | 162          | 0     | 0     | 0     | 0     |                |                |                |                |         |                           |                    |
| Supv3l1                | suppressor of var1, 3-like 1 (S. cerevisiae)                                                             | -1.51 | 6.59E-06 | 0.000167  | OTTMUST00000041801  | 211          | 0     | 0     | 0     | 0     |                |                |                |                |         |                           |                    |
| Abcb6                  | ATP-binding cassette, sub-family B (MDR/TAP), member 6                                                   | -1.51 | 8.17E-06 | 0.000193  | ENSMUST00000027396  | 163          | 0     | 0     | 0     | 0     |                |                |                |                |         |                           |                    |
| 4930534B04Ri<br>k      | RIKEN cDNA 4930534B04 gene                                                                               | -1.51 | 9.36E-06 | 0.000213  | OTTMUST00000084463  | 1031         | 0     | 0     | 0     | 0     |                |                |                |                |         |                           |                    |
| Anlr                   | anilin receptor                                                                                          | -1.51 | 1.93E-05 | 0.000336  | OTTMUST00000032555  | 2157         | 0     | 1     | 0     | 2     |                | 0.237          |                | -0.575         |         |                           | -0.252             |
| Dlst                   | dihydrolipoamide S-succinyltransferase (E2 component of 2-oxo-glutarate complex)                         | -1.51 | 5.58E-05 | 0.000678  | ENSMUST00000053811  | 1330         | 0     | 0     | 0     | 0     |                |                |                |                |         |                           |                    |
| 2610507B11Ri<br>k      | RIKEN cDNA 2610507B11 gene                                                                               | -1.51 | 0.000249 | 0.00199   | OTTMUST00000003333  | 640          | 0     | 0     | 0     | 0     |                |                |                |                |         |                           |                    |
| Cdh4                   | cadherin 4                                                                                               | -1.51 | 0.000263 | 0.00207   | OTTMUST00000038868  | 3455         | 0     | 2     | 0     | 2     |                | -1.364         |                | 0.618          |         |                           | -0.179             |
| Rbm38                  | RNA binding motif protein 38                                                                             | -1.51 | 0.00172  | 0.00838   | OTTMUST00000040393  | 925          | 0     | 0     | 0     | 0     |                |                |                |                |         |                           |                    |
| Piqa                   | phosphatidylinositol glycan anchor biosynthesis, class Q                                                 | -1.5  | 1.06E-07 | 1.21E-05  | OTTMUST00000082547  | 1176         | 0     | 1     | 0     | 0     |                |                |                |                |         |                           | -0.155             |
| Etdh                   | electron transferring flavoprotein, dehydrogenase                                                        | -1.5  | 1.60E-07 | 1.66E-05  | OTTMUST00000072852  | 214          | 0     | 0     | 0     | 0     |                |                |                |                |         |                           |                    |
| L2hdh                  | L-2-hydroxyglutarate dehydrogenase                                                                       | -1.5  | 3.86E-07 | 2.58E-05  | NM_145443           | 1865         | 0     | 0     | 0     | 1     |                |                |                |                |         |                           |                    |
| P2ry14                 | purinergic receptor P2Y, G-protein coupled, 14                                                           | -1.5  | 1.43E-06 | 5.88E-05  | ENSMUST00000065220  | 395          | 0     | 0     | 0     | 0     |                |                |                |                |         |                           |                    |

| Symbol       | Description                                                  | FC   | P.Value  | adj.P.Val | Transcript         | 3'UTR length | 9mers | 8mers | 7mers | 6mers | 9mers_c<br>ons | 8mers_c<br>ons | 7mers_c<br>ons | 6mers_c<br>ons | TS6_PCT | TSC_Context<br>Plus_rerun | TargetScan_<br>ORF |
|--------------|--------------------------------------------------------------|------|----------|-----------|--------------------|--------------|-------|-------|-------|-------|----------------|----------------|----------------|----------------|---------|---------------------------|--------------------|
| Fln          | folliculin                                                   | -1.5 | 1.66E-06 | 6.40E-05  | OTTMUST00000018400 | 1202         | 0     | 0     | 0     | 0     |                |                |                |                |         |                           |                    |
| Bnp44        | brain protein 44                                             | -1.5 | 2.81E-06 | 9.25E-05  | OTTMUST00000054065 | 275          | 0     | 0     | 0     | 0     |                |                |                |                |         |                           |                    |
| 1110038D17Rk | RIKEN cDNA 1110038D17 gene                                   | -1.5 | 3.19E-06 | 0.000101  | OTTMUST00000078804 | 2595         | 0     | 1     | 1     | 0     |                |                |                |                |         |                           | -0.142             |
| Cox15        | COX15 homolog, cytochrome c oxidase assembly protein (yeast) | -1.5 | 1.75E-05 | 0.000318  | OTTMUST00000065269 | 3467         | 0     | 0     | 2     | 2     |                |                | -0.24          | 0.145          |         |                           | -0.193             |
| Rtn2         | reticulon 2 (Z-band associated protein)                      | -1.5 | 2.19E-05 | 0.000365  | ENSMUST00000032559 | 358          | 0     | 0     | 0     | 0     |                |                |                |                |         |                           |                    |
| Spryd4       | SPRY domain containing 4                                     | -1.5 | 3.27E-05 | 0.000475  | ENSMUST00000061995 | 939          | 0     | 0     | 1     | 0     |                |                | 0.288          |                |         |                           | -0.12              |
| Homer1       | homer homolog 1 (Drosophila)                                 | -1.5 | 0.000112 | 0.00111   | OTTMUST00000039265 | 4349         | 0     | 2     | 0     | 2     | 0.424          |                | -0.916         |                |         |                           | -0.366             |
| Casz1        | castor homolog 1, zinc finger (Drosophila)                   | -1.5 | 0.000371 | 0.00265   | OTTMUST00000025638 | 2318         | 0     | 0     | 1     | 0     |                |                | 0.911          |                |         |                           | -0.101             |
| Kcnk3        | potassium channel, subfamily K, member 3                     | -1.5 | 0.000446 | 0.00304   | ENSMUST00000066295 | 2433         | 0     | 1     | 0     | 2     |                | -1.06          | 0.037          |                |         |                           | -0.101             |
| Lama5        | laminin, alpha 5                                             | -1.5 | 0.00167  | 0.00821   | OTTMUST00000039036 | 174          | 0     | 0     | 0     | 0     |                |                |                |                |         |                           |                    |

Only those genes dysregulated 1.5-fold or greater are listed in table.

FC: Fold change over WT; P value: raw p-value; adj.Pvalue: p-value adjusted to false discovery rate

9mers, 8mers, 7mers, 6mers: the number of miR-22 seed-matching sites in 3'UTR, color is according to their size (red, 6mers; blue, 7mers; green, 8mers; orange, 9mers).

9/8/7/6mers\_cons: Average GERP conservation scores across miR-22 seed matching sites, according to genomic alignment. If the 3'UTR has more than one site, highest score is reported.

TS6\_PCT: Probability of Conserved Targeting, according to TargetScan 6.0

TS6\_ContextPlus: Context+ scores from TargetScan 6.0

TS6\_ContextPlus\_rerun: To account for differences between our sequences with those used by TargetScan, we re-ran the targetscan\_60\_context\_scores.pl script to obtain these Context+ scores for exactly our 3'UTR sequences.

TargetScan\_ORF: Genes reported to have a conserved seed target in their coding region, see Methods

Microarray data was deposited in Array Express: E-MTAB-501

**Table S2. Genes disregulated in *miR-22*-null hearts (continued)**

**Up-regulated genes (genes with greater 2-fold induction are shown)**

| Symbol        | Description                                                             | FC   | P.Value  | adj.P.Val | Transcript         |
|---------------|-------------------------------------------------------------------------|------|----------|-----------|--------------------|
| Myh7          | myosin, heavy polypeptide 7, cardiac muscle, beta                       | 17.2 | 8.41E-09 | 3.31E-06  | OTTMUST00000039449 |
| Nppa          | natriuretic peptide precursor type A                                    | 8.71 | 2.35E-06 | 8.13E-05  | OTTMUST00000023685 |
| Scgb1c1       | secretoglobin, family 1C, member 1                                      | 7.75 | 1.94E-10 | 9.69E-07  | ENSMUST00000035300 |
| Rcan1         | regulator of calcineurin 1                                              | 7.44 | 6.45E-08 | 9.55E-06  | NM_019466          |
| Nmral1        | NmrA-like family domain containing 1                                    | 5.16 | 2.60E-10 | 9.69E-07  | OTTMUST00000065955 |
| 2610028H24Rik | RIKEN cDNA 2610028H24 gene                                              | 5.13 | 0.000491 | 0.00326   | OTTMUST00000048272 |
| Acta1         | actin, alpha 1, skeletal muscle                                         | 5.04 | 2.69E-09 | 2.74E-06  | ENSMUST00000034453 |
| Nppb          | natriuretic peptide precursor type B                                    | 4.25 | 1.87E-09 | 2.26E-06  | OTTMUST00000023693 |
| Ctgf          | connective tissue growth factor                                         | 4.24 | 3.12E-06 | 1.00E-04  | OTTMUST00000047191 |
| Acta2         | actin, alpha 2, smooth muscle, aorta                                    | 4.19 | 9.11E-09 | 3.31E-06  | NM_007392          |
| Acta2         | actin, alpha 2, smooth muscle, aorta                                    | 3.99 | 1.76E-09 | 2.26E-06  | ENSMUST00000039631 |
| Itgb1bp3      | integrin beta 1 binding protein 3                                       | 3.95 | 6.13E-10 | 1.12E-06  | ENSMUST0000005069  |
| Fhl1          | four and a half LIM domains 1                                           | 3.93 | 2.54E-06 | 8.64E-05  | OTTMUST00000042746 |
| Slc24a2       | solute carrier family 24 (sodium/potassium/calcium exchanger), member 2 | 3.4  | 5.62E-08 | 8.66E-06  | OTTMUST00000017530 |
| Rcan1         | regulator of calcineurin 1                                              | 3.16 | 9.42E-08 | 1.16E-05  | ENSMUST00000060005 |
| Spsb4         | splA/ryanodine receptor domain and SOCS box containing 4                | 3.15 | 2.83E-06 | 9.29E-05  | OTTMUST00000071893 |
| Lman1l        | lectin, mannose-binding 1 like                                          | 2.95 | 7.04E-07 | 3.66E-05  | OTTMUST00000074318 |
| Pdlim3        | PDZ and LIM domain 3                                                    | 2.83 | 9.29E-09 | 3.31E-06  | ENSMUST00000034053 |
| Cp            | ceruloplasmin                                                           | 2.71 | 2.28E-07 | 1.88E-05  | OTTMUST00000057275 |
| Cnksr1        | connector enhancer of kinase suppressor of Ras 1                        | 2.67 | 9.99E-09 | 3.31E-06  | OTTMUST00000024609 |
| Xirp2         | xin actin-binding repeat containing 2                                   | 2.67 | 9.91E-07 | 4.54E-05  | OTTMUST00000030942 |
| Sypl2         | synaptophysin-like 2                                                    | 2.6  | 7.49E-08 | 9.96E-06  | OTTMUST00000016565 |
| Arhgap24      | Rho GTPase activating protein 24                                        | 2.59 | 9.49E-09 | 3.31E-06  | OTTMUST00000055707 |
| 1500017E21Rik | RIKEN cDNA 1500017E21 gene                                              | 2.57 | 6.15E-10 | 1.12E-06  | OTTMUST00000070864 |
| Myot          | myotilin                                                                | 2.45 | 5.69E-09 | 2.96E-06  | OTTMUST00000035442 |
| Etv5          | ets variant gene 5                                                      | 2.45 | 8.88E-06 | 0.000204  | ENSMUST00000051229 |
| C4b           | complement component 4B (Childo blood group)                            | 2.45 | 0.00429  | 0.0168    | ENSMUST00000069507 |
| LOC626152     | similar to Epiplakin                                                    | 2.4  | 1.45E-06 | 5.88E-05  | XR_032670          |
| Sort1         | sortilin 1                                                              | 2.34 | 1.78E-07 | 1.75E-05  | OTTMUST00000016875 |
| Mybpc2        | myosin binding protein C, fast-type                                     | 2.33 | 6.02E-07 | 3.36E-05  | NM_178067          |
| Dpysl3        | dihydropyrimidinase-like 3                                              | 2.28 | 1.89E-05 | 0.000333  | OTTMUST00000073510 |
| Fam122b       | family with sequence similarity 122, member B                           | 2.27 | 5.19E-05 | 0.000647  | OTTMUST00000042133 |
| Naca          | nascent polypeptide-associated complex alpha polypeptide                | 2.25 | 2.33E-06 | 8.09E-05  | NM_013608          |
| Gnmt          | glycine N-methyltransferase                                             | 2.23 | 5.92E-05 | 0.000706  | OTTMUST00000065249 |
| 1500009L16Rik | RIKEN cDNA 1500009L16 gene                                              | 2.22 | 3.88E-09 | 2.78E-06  | XM_899407          |
| Hn1           | hematological and neurological expressed sequence 1                     | 2.19 | 1.52E-06 | 6.02E-05  | OTTMUST00000007275 |
| Polr1e        | polymerase (RNA) I polypeptide E                                        | 2.18 | 9.50E-05 | 0.000986  | OTTMUST00000017087 |
| C4a           | complement component 4A (Rodgers blood group)                           | 2.18 | 0.0129   | 0.0395    | ENSMUST00000015595 |
| Atpif1        | ATPase inhibitory factor 1                                              | 2.17 | 2.67E-10 | 9.69E-07  | OTTMUST00000022663 |
| Pdlim1        | PDZ and LIM domain 1 (elfin)                                            | 2.17 | 1.82E-06 | 6.74E-05  | ENSMUST00000068439 |

| Symbol           | Description                                                                                             | FC   | P.Value  | adj.P.Val | Transcript                |
|------------------|---------------------------------------------------------------------------------------------------------|------|----------|-----------|---------------------------|
| <u>Tmem176b</u>  | transmembrane protein 176B                                                                              | 2.13 | 4.46E-07 | 2.80E-05  | <u>ENSMUST00000031833</u> |
| <u>Tspan17</u>   | tetraspanin 17                                                                                          | 2.12 | 6.81E-05 | 0.000777  | <u>OTTMUST00000081270</u> |
| <u>Serpina3n</u> | serine (or cysteine) peptidase inhibitor, clade A, member 3N                                            | 2.12 | 0.00432  | 0.0169    | <u>OTTMUST00000039207</u> |
| <u>Itgb5</u>     | integrin beta 5                                                                                         | 2.11 | 7.14E-06 | 0.000178  | <u>OTTMUST00000070600</u> |
| <u>Rrp12</u>     | ribosomal RNA processing 12 homolog (S. cerevisiae)                                                     | 2.1  | 1.01E-05 | 0.000223  | <u>ENSMUST00000038677</u> |
| <u>Dnaia4</u>    | DnaJ (Hsp40) homolog, subfamily A, member 4                                                             | 2.08 | 4.45E-06 | 0.000126  | <u>OTTMUST00000067744</u> |
| <u>Slc1a1</u>    | solute carrier family 1 (neuronal/epithelial high affinity glutamate transporter, system Xag), member 1 | 2.08 | 3.24E-05 | 0.000474  | <u>OTTMUST00000085484</u> |
| <u>Nuak1</u>     | NUAK family, SNF1-like kinase, 1                                                                        | 2.07 | 4.20E-06 | 0.000122  | <u>OTTMUST00000054650</u> |
| <u>Pbxip1</u>    | pre-B-cell leukemia transcription factor interacting protein 1                                          | 2.07 | 7.39E-06 | 0.000181  | <u>OTTMUST00000052415</u> |
| <u>Ccl21a</u>    | chemokine (C-C motif) ligand 21A                                                                        | 2.07 | 0.000966 | 0.00545   | <u>OTTMUST00000015039</u> |
| <u>Prkcz</u>     | protein kinase C, zeta                                                                                  | 2.06 | 3.26E-07 | 2.31E-05  | <u>OTTMUST00000024748</u> |
| <u>H19</u>       | H19 fetal liver mRNA                                                                                    | 2.06 | 4.39E-06 | 0.000125  | <u>OTTMUST00000035613</u> |
| <u>Lrp11</u>     | low density lipoprotein receptor-related protein 11                                                     | 2.04 | 9.92E-05 | 0.00102   | <u>OTTMUST00000081563</u> |
| <u>Maged2</u>    | melanoma antigen, family D, 2                                                                           | 2.03 | 2.63E-06 | 8.85E-05  | <u>OTTMUST00000086091</u> |
| <u>Ppfibp1</u>   | PTPRF interacting protein, binding protein 1 (liprin beta 1)                                            | 2.02 | 1.81E-07 | 1.76E-05  | <u>OTTMUST00000055355</u> |
| <u>Adamts15</u>  | ADAMTS-like 5                                                                                           | 2.01 | 5.06E-08 | 8.36E-06  | <u>OTTMUST00000045831</u> |

Only those genes dysregulated 2.0-fold or greater are listed in table.

FC: Fold change over WT; P value: raw p-value; adj.Pvalue: p-value adjusted to false discovery rate
