# Supplementary material for: microRNA-22 Promotes Heart Failure through Coordinate Suppression of PPAR/ERR-Nuclear Hormone Receptor Transcription
Source: PubMed Central journal article supplement (PMC3785418; doi:10.1371/journal.pone.0075882), 2013-09-27
Supplement: pone.0075882.s008.pdf [file pone.0075882.s008.pdf]

**Table S3. Potential targets of *miR-22* in the heart**

| Entrez Gene Name                                                                                                                                   | Location            | Family                     | Cellular Growth and Proliferation | Cell Death | Lipid Metabolism | Molecule Biochemistry | Cardiovascular Disease |
|----------------------------------------------------------------------------------------------------------------------------------------------------|---------------------|----------------------------|-----------------------------------|------------|------------------|-----------------------|------------------------|
| abhydrolase domain containing 8                                                                                                                    | unknown             | enzyme                     |                                   |            |                  |                       |                        |
| acyl-Coenzyme A dehydrogenase family, member 8                                                                                                     | Cytoplasm           | enzyme                     |                                   |            |                  |                       |                        |
| acyl-Coenzyme A dehydrogenase family, member 9                                                                                                     | Cytoplasm           | enzyme                     |                                   |            |                  |                       |                        |
| acyl-Coenzyme A dehydrogenase, long chain                                                                                                          | Cytoplasm           | enzyme                     |                                   |            |                  |                       |                        |
| acyl-CoA synthetase long-chain family member 6                                                                                                     | Cytoplasm           | enzyme                     |                                   |            |                  |                       |                        |
| alcohol dehydrogenase, iron containing, 1                                                                                                          | unknown             | enzyme                     |                                   |            |                  |                       |                        |
| adenosine kinase                                                                                                                                   | Nucleus             | kinase                     |                                   |            |                  |                       |                        |
| AHNAK nucleoprotein                                                                                                                                | Nucleus             | other                      |                                   |            |                  |                       |                        |
| aryl-hydrocarbon receptor repressor                                                                                                                | Nucleus             | other                      |                                   |            |                  |                       |                        |
| apoptosis-inducing factor, mitochondrion-associated, 2                                                                                             | Cytoplasm           | enzyme                     |                                   |            |                  |                       |                        |
| aldehyde dehydrogenase 1 family, member L2                                                                                                         | unknown             | enzyme                     |                                   |            |                  |                       |                        |
| aldehyde dehydrogenase 2 family (mitochondrial)                                                                                                    | Cytoplasm           | enzyme                     |                                   |            |                  |                       |                        |
| aldehyde dehydrogenase 5 family, member A1                                                                                                         | Cytoplasm           | enzyme                     |                                   |            |                  |                       |                        |
| alkB, alkylation repair homolog 5 (E. coli)                                                                                                        | unknown             | other                      |                                   |            |                  |                       |                        |
| arachidonate 5-lipoxygenase                                                                                                                        | Cytoplasm           | enzyme                     |                                   |            |                  |                       |                        |
| anaphase promoting complex subunit 5                                                                                                               | Nucleus             | enzyme                     |                                   |            |                  |                       |                        |
| ankyrin repeat domain 50                                                                                                                           | unknown             | other                      |                                   |            |                  |                       |                        |
| amyloid beta (A4) precursor protein-binding, family B, member 2                                                                                    | Cytoplasm           | other                      |                                   |            |                  |                       |                        |
| apelin receptor                                                                                                                                    | Plasma Membrane     | G-protein coupled receptor |                                   |            |                  |                       |                        |
| ArfGAP with RhoGAP domain, ankyrin repeat and PH domain 3                                                                                          | Nucleus             | other                      |                                   |            |                  |                       |                        |
| activity-regulated cytoskeleton-associated protein                                                                                                 | Cytoplasm           | other                      |                                   |            |                  |                       |                        |
| ADP-ribosylation factor GTPase activating protein 2                                                                                                | Nucleus             | other                      |                                   |            |                  |                       |                        |
| ADP-ribosylation factor related protein 1                                                                                                          | Cytoplasm           | enzyme                     |                                   |            |                  |                       |                        |
| Rho guanine nucleotide exchange factor (GEF) 15                                                                                                    | Cytoplasm           | other                      |                                   |            |                  |                       |                        |
| ankyrin repeat and SOCS box-containing 13                                                                                                          | unknown             | other                      |                                   |            |                  |                       |                        |
| ankyrin repeat and SOCS box-containing 8                                                                                                           | Nucleus             | transcription regulator    |                                   |            |                  |                       |                        |
| ATPase, Na <sup>+</sup> /K <sup>+</sup> transporting, alpha 2 (+) polypeptide                                                                      | Plasma Membrane     | transporter                |                                   |            |                  |                       |                        |
| ATPase, Ca <sup>++</sup> transporting, ubiquitous                                                                                                  | Cytoplasm           | transporter                |                                   |            |                  |                       |                        |
| ATP synthase, H <sup>+</sup> transporting, mitochondrial F0 complex, subunit C1 (subunit 9)                                                        | Cytoplasm           | transporter                |                                   |            |                  |                       |                        |
| ATPase, class II, type 9B                                                                                                                          | Cytoplasm           | transporter                |                                   |            |                  |                       |                        |
| ataxin 1                                                                                                                                           | Nucleus             | other                      |                                   |            |                  |                       |                        |
| apoptosis, caspase activation inhibitor                                                                                                            | Cytoplasm           | ion channel                |                                   |            |                  |                       |                        |
| BTB and CNC homology 1, basic leucine zipper transcription factor 1                                                                                | Nucleus             | transcription regulator    |                                   |            |                  |                       |                        |
| BRCA1 associated protein-1 (ubiquitin carboxy-terminal hydrolase)                                                                                  | Nucleus             | peptidase                  |                                   |            |                  |                       |                        |
| BCL2-like 11 (apoptosis facilitator)                                                                                                               | Cytoplasm           | other                      |                                   |            |                  |                       |                        |
| B-cell CLL/lymphoma 9-like                                                                                                                         | Cytoplasm           | other                      |                                   |            |                  |                       |                        |
| bromodomain containing 4                                                                                                                           | Nucleus             | kinase                     |                                   |            |                  |                       |                        |
| calmodulin 3 (phosphorylase kinase, delta)                                                                                                         | Plasma Membrane     | other                      |                                   |            |                  |                       |                        |
| calmodulin binding transcription activator 2                                                                                                       | unknown             | other                      |                                   |            |                  |                       |                        |
| CASK interacting protein 2                                                                                                                         | Cytoplasm           | other                      |                                   |            |                  |                       |                        |
| castor zinc finger 1                                                                                                                               | Nucleus             | enzyme                     |                                   |            |                  |                       |                        |
| caveolin 3                                                                                                                                         | Plasma Membrane     | enzyme                     |                                   |            |                  |                       |                        |
| cyclin G1                                                                                                                                          | Nucleus             | other                      |                                   |            |                  |                       |                        |
| CD82 molecule                                                                                                                                      | Plasma Membrane     | other                      |                                   |            |                  |                       |                        |
| CD93 molecule                                                                                                                                      | Plasma Membrane     | other                      |                                   |            |                  |                       |                        |
| cadherin 4, type 1, R-cadherin (retinal)                                                                                                           | Plasma Membrane     | other                      |                                   |            |                  |                       |                        |
| CDKN2A interacting protein N-terminal like                                                                                                         | unknown             | other                      |                                   |            |                  |                       |                        |
| centromere protein A                                                                                                                               | Nucleus             | other                      |                                   |            |                  |                       |                        |
| centromere protein V                                                                                                                               | Nucleus             | other                      |                                   |            |                  |                       |                        |
| chromodomain helicase DNA binding protein 7                                                                                                        | Nucleus             | enzyme                     |                                   |            |                  |                       |                        |
| chromatin accessibility complex 1                                                                                                                  | Nucleus             | enzyme                     |                                   |            |                  |                       |                        |
| cytokine induced apoptosis inhibitor 1                                                                                                             | Cytoplasm           | other                      |                                   |            |                  |                       |                        |
| claudin domain containing 1                                                                                                                        | Plasma Membrane     | other                      |                                   |            |                  |                       |                        |
| C-type lectin domain family 16, member A                                                                                                           | unknown             | other                      |                                   |            |                  |                       |                        |
| chloride intracellular channel 4                                                                                                                   | Cytoplasm           | ion channel                |                                   |            |                  |                       |                        |
| contactin 2 (axonal)                                                                                                                               | Plasma Membrane     | other                      |                                   |            |                  |                       |                        |
| coronin 6                                                                                                                                          | unknown             | other                      |                                   |            |                  |                       |                        |
| COX15 homolog, cytochrome c oxidase assembly protein (yeast)                                                                                       | Cytoplasm           | enzyme                     |                                   |            |                  |                       |                        |
| cytoplasmic polyadenylation element binding protein 3                                                                                              | unknown             | other                      |                                   |            |                  |                       |                        |
| calcineurin-like phosphoesterase domain containing 1                                                                                               | unknown             | enzyme                     |                                   |            |                  |                       |                        |
| cold shock domain containing C2, RNA binding                                                                                                       | Cytoplasm           | other                      |                                   |            |                  |                       |                        |
| colony stimulating factor 1 (macrophage)                                                                                                           | Extracellular Space | cytokine                   |                                   |            |                  |                       |                        |
| cystinosis, nephropathic                                                                                                                           | Cytoplasm           | transporter                |                                   |            |                  |                       |                        |
| cut-like homeobox 1                                                                                                                                | Nucleus             | transcription regulator    |                                   |            |                  |                       |                        |
| chemokine (C-X-C motif) ligand 12 (stromal cell-derived factor 1)                                                                                  | Extracellular Space | cytokine                   |                                   |            |                  |                       |                        |
| cytochrome P450, family 2, subfamily S, polypeptide 1                                                                                              | Cytoplasm           | enzyme                     |                                   |            |                  |                       |                        |
| D-aspartate oxidase                                                                                                                                | Cytoplasm           | enzyme                     |                                   |            |                  |                       |                        |
| DEAD (Asp-Glu-Ala-Asp) box polypeptide 49                                                                                                          | Nucleus             | enzyme                     |                                   |            |                  |                       |                        |
| DENN/MADD domain containing 3                                                                                                                      | unknown             | other                      |                                   |            |                  |                       |                        |
| DEAH (Asp-Glu-Ala-His) box polypeptide 35                                                                                                          | unknown             | enzyme                     |                                   |            |                  |                       |                        |
| DnaJ (Hsp40) homolog, subfamily A, member 3                                                                                                        | Cytoplasm           | other                      |                                   |            |                  |                       |                        |
| DnaJ (Hsp40) homolog, subfamily C, member 27                                                                                                       | unknown             | enzyme                     |                                   |            |                  |                       |                        |
| DnaJ (Hsp40) homolog, subfamily C, member 28                                                                                                       | unknown             | other                      |                                   |            |                  |                       |                        |
| DnaJ (Hsp40) homolog, subfamily C, member 7                                                                                                        | Cytoplasm           | other                      |                                   |            |                  |                       |                        |
| dolichyl-phosphate mannosyltransferase polypeptide 2, regulatory subunit                                                                           | Cytoplasm           | enzyme                     |                                   |            |                  |                       |                        |
| dpy-30 homolog (C. elegans)                                                                                                                        | Nucleus             | other                      |                                   |            |                  |                       |                        |
| dihydropyrimidinase-like 4                                                                                                                         | Cytoplasm           | enzyme                     |                                   |            |                  |                       |                        |
| dual specificity phosphatase 28                                                                                                                    | unknown             | other                      |                                   |            |                  |                       |                        |
| enoyl Coenzyme A hydratase, short chain, 1, mitochondrial                                                                                          | Cytoplasm           | enzyme                     |                                   |            |                  |                       |                        |
| enhancer of mRNA decapping 3 homolog (S. cerevisiae)                                                                                               | Cytoplasm           | other                      |                                   |            |                  |                       |                        |
| EF-hand calcium binding domain 2                                                                                                                   | unknown             | other                      |                                   |            |                  |                       |                        |
| ephrin-A1                                                                                                                                          | Plasma Membrane     | other                      |                                   |            |                  |                       |                        |
| epidermal growth factor receptor pathway substrate 15-like 1 excision repair cross-complementing rodent repair deficiency, complementation group 8 | Nucleus             | transcription regulator    |                                   |            |                  |                       |                        |
| ER lipid raft associated 2                                                                                                                         | Plasma Membrane     | other                      |                                   |            |                  |                       |                        |
| electron-transfer-flavoprotein, alpha polypeptide                                                                                                  | Cytoplasm           | transporter                |                                   |            |                  |                       |                        |
| v-ets erythroblastosis virus E26 oncogene homolog 1 (avian)                                                                                        | Nucleus             | transcription regulator    |                                   |            |                  |                       |                        |
| family with sequence similarity 101, member B                                                                                                      | unknown             | other                      |                                   |            |                  |                       |                        |
| family with sequence similarity 168, member B                                                                                                      | unknown             | other                      |                                   |            |                  |                       |                        |
| family with sequence similarity 49, member B                                                                                                       | unknown             | other                      |                                   |            |                  |                       |                        |
| family with sequence similarity 53, member C                                                                                                       | unknown             | other                      |                                   |            |                  |                       |                        |
| F-box and WD repeat domain containing 5                                                                                                            | Cytoplasm           | other                      |                                   |            |                  |                       |                        |
| fms-related tyrosine kinase 1 (vascular endothelial growth factor/vascular permeability factor receptor)                                           | Plasma Membrane     | kinase                     |                                   |            |                  |                       |                        |

| Entrez Gene Name                                                                             | Location            | Family                     | Cellular Growth and Proliferation | Cell Death | Lipid Metabolism | Molecule Biochemistry | Cardiovascular Disease |
|----------------------------------------------------------------------------------------------|---------------------|----------------------------|-----------------------------------|------------|------------------|-----------------------|------------------------|
| fibronectin type III domain containing 5                                                     | unknown             | other                      |                                   |            |                  |                       |                        |
| FAD-dependent oxidoreductase domain containing 1                                             | Cytoplasm           | other                      |                                   |            |                  |                       |                        |
| FUN14 domain containing 1                                                                    | unknown             | other                      |                                   |            |                  |                       |                        |
| furin (paired basic amino acid cleaving enzyme)                                              | Cytoplasm           | peptidase                  |                                   |            |                  |                       |                        |
| galactose mutarotase (aldose 1-epimerase)                                                    | Cytoplasm           | enzyme                     |                                   |            |                  |                       |                        |
| glutamyl-tRNA(Gln) amidotransferase, subunit C homolog (bacterial)                           | Nucleus             | other                      |                                   |            |                  |                       |                        |
| glioblastoma amplified sequence                                                              | Plasma Membrane     | other                      |                                   |            |                  |                       |                        |
| glucokinase (hexokinase 4)                                                                   | Cytoplasm           | kinase                     |                                   |            |                  |                       |                        |
| glycerophosphodiester phosphodiesterase domain containing 1                                  | unknown             | enzyme                     |                                   |            |                  |                       |                        |
| G elongation factor, mitochondrial 2                                                         | Cytoplasm           | translation regulator      |                                   |            |                  |                       |                        |
| glutaredoxin (thioltransferase)                                                              | Cytoplasm           | enzyme                     |                                   |            |                  |                       |                        |
| glutaredoxin 2                                                                               | Cytoplasm           | enzyme                     |                                   |            |                  |                       |                        |
| gon-4-like (C. elegans)                                                                      | unknown             | other                      |                                   |            |                  |                       |                        |
| GC-rich promoter binding protein 1                                                           | Nucleus             | transcription regulator    |                                   |            |                  |                       |                        |
| glypican 1                                                                                   | Plasma Membrane     | transmembrane receptor     |                                   |            |                  |                       |                        |
| G protein-coupled receptor 22                                                                | Plasma Membrane     | G-protein coupled receptor |                                   |            |                  |                       |                        |
| G-protein signaling modulator 1 (AGS3-like, C. elegans)                                      | Cytoplasm           | other                      |                                   |            |                  |                       |                        |
| GSG1-like                                                                                    | unknown             | other                      |                                   |            |                  |                       |                        |
| GTP binding protein 1                                                                        | Cytoplasm           | enzyme                     |                                   |            |                  |                       |                        |
| H3 histone, family 3B (H3.3B)                                                                | Nucleus             | other                      |                                   |            |                  |                       |                        |
| hairly/enhancer-of-split related with YRPW motif 1                                           | Nucleus             | transcription regulator    |                                   |            |                  |                       |                        |
| 3-hydroxyisobutyrate dehydrogenase                                                           | Cytoplasm           | enzyme                     |                                   |            |                  |                       |                        |
| H2.0-like homeobox                                                                           | Nucleus             | transcription regulator    |                                   |            |                  |                       |                        |
| heterogeneous nuclear ribonucleoprotein A3                                                   | Nucleus             | other                      |                                   |            |                  |                       |                        |
| homer homolog 1 (Drosophila)                                                                 | Plasma Membrane     | other                      |                                   |            |                  |                       |                        |
| HFRAS-like suppressor                                                                        | Cytoplasm           | other                      |                                   |            |                  |                       |                        |
| heparan sulfate proteoglycan 2                                                               | Plasma Membrane     | other                      |                                   |            |                  |                       |                        |
| HIV-1 Tat interactive protein 2, 30kDa                                                       | Nucleus             | transcription regulator    |                                   |            |                  |                       |                        |
| HUS1 checkpoint homolog (S. pombe)                                                           | Nucleus             | kinase                     |                                   |            |                  |                       |                        |
| intraflagellar transport 20 homolog (Chlamydomonas)                                          | Cytoplasm           | other                      |                                   |            |                  |                       |                        |
| integrin alpha FG-GAP repeat containing 2                                                    | unknown             | other                      |                                   |            |                  |                       |                        |
| integrin, beta 6                                                                             | Plasma Membrane     | other                      |                                   |            |                  |                       |                        |
| inositol 1,4,5-trisphosphate 3-kinase B                                                      | Cytoplasm           | kinase                     |                                   |            |                  |                       |                        |
| inositol 1,4,5-trisphosphate receptor, type 2                                                | Cytoplasm           | ion channel                |                                   |            |                  |                       |                        |
| inositol 1,4,5-trisphosphate receptor interacting protein-like 1                             | unknown             | other                      |                                   |            |                  |                       |                        |
| junctional adhesion molecule 2                                                               | Plasma Membrane     | other                      |                                   |            |                  |                       |                        |
| potassium inwardly-rectifying channel, subfamily J, member 8                                 | Plasma Membrane     | ion channel                |                                   |            |                  |                       |                        |
| potassium channel, subfamily K, member 3                                                     | Plasma Membrane     | ion channel                |                                   |            |                  |                       |                        |
| potassium channel, subfamily V, member 2                                                     | Cytoplasm           | ion channel                |                                   |            |                  |                       |                        |
| potassium channel tetramerisation domain containing 10                                       | unknown             | ion channel                |                                   |            |                  |                       |                        |
| lysine (K)-specific demethylase 3A                                                           | unknown             | other                      |                                   |            |                  |                       |                        |
| lysine (K)-specific demethylase 6B                                                           | unknown             | other                      |                                   |            |                  |                       |                        |
| kelch domain containing 10                                                                   | unknown             | other                      |                                   |            |                  |                       |                        |
| kelch domain containing 3                                                                    | Cytoplasm           | other                      |                                   |            |                  |                       |                        |
| KRAB_A domain containing 1                                                                   | unknown             | other                      |                                   |            |                  |                       |                        |
| limb bud and heart development homolog (mouse)                                               | Nucleus             | transcription regulator    |                                   |            |                  |                       |                        |
| Ly6/neurotoxin 1                                                                             | Plasma Membrane     | transporter                |                                   |            |                  |                       |                        |
| mitogen-activated protein kinase kinase kinase 1                                             | Cytoplasm           | kinase                     |                                   |            |                  |                       |                        |
| MARVEL domain containing 1                                                                   | unknown             | other                      |                                   |            |                  |                       |                        |
| MCF2 cell line derived transforming sequence-like                                            | Cytoplasm           | other                      |                                   |            |                  |                       |                        |
| Meis homeobox 2                                                                              | Nucleus             | transcription regulator    |                                   |            |                  |                       |                        |
| microfibrillar-associated protein 3-like                                                     | unknown             | other                      |                                   |            |                  |                       |                        |
| major facilitator superfamily domain containing 11                                           | unknown             | other                      |                                   |            |                  |                       |                        |
| major facilitator superfamily domain containing 7C                                           |                     |                            |                                   |            |                  |                       |                        |
| monoglyceride lipase                                                                         | Plasma Membrane     | enzyme                     |                                   |            |                  |                       |                        |
| matrix metalloproteinase 15 (membrane-inserted)                                              | Extracellular Space | peptidase                  |                                   |            |                  |                       |                        |
| melanoregulin                                                                                | unknown             | other                      |                                   |            |                  |                       |                        |
| mitochondrial rRNA methyltransferase 1 homolog (S. cerevisiae)                               | unknown             | other                      |                                   |            |                  |                       |                        |
| mitochondrial ribosomal protein S26                                                          | Cytoplasm           | other                      |                                   |            |                  |                       |                        |
| mitochondrial ribosome recycling factor                                                      | Cytoplasm           | other                      |                                   |            |                  |                       |                        |
| mitochondrial carrier homolog 2 (C. elegans)                                                 | Cytoplasm           | other                      |                                   |            |                  |                       |                        |
| metallothionein-like 5, testis-specific (tesmin)                                             | Cytoplasm           | other                      |                                   |            |                  |                       |                        |
| myosin XVIIIa                                                                                | Cytoplasm           | other                      |                                   |            |                  |                       |                        |
| N(alpha)-acetyltransferase 10, NatA catalytic subunit                                        | Nucleus             | enzyme                     |                                   |            |                  |                       |                        |
| N(alpha)-acetyltransferase 20, NatB catalytic subunit                                        | Cytoplasm           | enzyme                     |                                   |            |                  |                       |                        |
| neural cell adhesion molecule 1                                                              | Plasma Membrane     | other                      |                                   |            |                  |                       |                        |
| nuclear receptor coactivator 1                                                               | Nucleus             | transcription regulator    |                                   |            |                  |                       |                        |
| nudE nuclear distribution gene E homolog 1 (A. nidulans)                                     | Nucleus             | other                      |                                   |            |                  |                       |                        |
| NADH dehydrogenase (ubiquinone) 1, alpha/beta subcomplex, 1, 8kDa                            | Cytoplasm           | enzyme                     |                                   |            |                  |                       |                        |
| NADH dehydrogenase (ubiquinone) Fe-S protein 5, 15kDa (NADH-coenzyme Q reductase)            | Cytoplasm           | enzyme                     |                                   |            |                  |                       |                        |
| NECAP endocytosis associated 1                                                               | Plasma Membrane     | other                      |                                   |            |                  |                       |                        |
| neural precursor cell expressed, developmentally down-regulated 1                            | Cytoplasm           | other                      |                                   |            |                  |                       |                        |
| nuclear transcription factor Y, beta                                                         | Nucleus             | transcription regulator    |                                   |            |                  |                       |                        |
| Notch homolog 4 (Drosophila)                                                                 | Plasma Membrane     | transcription regulator    |                                   |            |                  |                       |                        |
| Niemann-Pick disease, type C1                                                                | Cytoplasm           | transporter                |                                   |            |                  |                       |                        |
| nudix (nucleoside diphosphate linked moiety X)-type motif 16-like 1                          | Cytoplasm           | other                      |                                   |            |                  |                       |                        |
| nudix (nucleoside diphosphate linked moiety X)-type motif 4                                  | Cytoplasm           | phosphatase                |                                   |            |                  |                       |                        |
| nuclear mitotic apparatus protein 1                                                          | Nucleus             | other                      |                                   |            |                  |                       |                        |
| oxoglutarate (alpha-ketoglutarate) dehydrogenase (lipoamide)                                 | Cytoplasm           | enzyme                     |                                   |            |                  |                       |                        |
| osteoglycin                                                                                  | Extracellular Space | growth factor              |                                   |            |                  |                       |                        |
| optineurin                                                                                   | Cytoplasm           | other                      |                                   |            |                  |                       |                        |
| oxysterol binding protein-like 3                                                             | Cytoplasm           | other                      |                                   |            |                  |                       |                        |
| OTU domain containing 4                                                                      | unknown             | other                      |                                   |            |                  |                       |                        |
| PAN2 poly(A) specific ribonuclease subunit homolog (S. cerevisiae)                           | Cytoplasm           | peptidase                  |                                   |            |                  |                       |                        |
| protocadherin 12                                                                             | Plasma Membrane     | other                      |                                   |            |                  |                       |                        |
| progressive external ophthalmoplegia 1 (human)                                               | unknown             | other                      |                                   |            |                  |                       |                        |
| pyruvate dehydrogenase (lipoamide) alpha 1                                                   | Cytoplasm           | enzyme                     |                                   |            |                  |                       |                        |
| pyruvate dehydrogenase kinase, isozyme 1                                                     | Cytoplasm           | kinase                     |                                   |            |                  |                       |                        |
| pyruvate dehydrogenase phosphatase catalytic subunit 2                                       | Cytoplasm           | phosphatase                |                                   |            |                  |                       |                        |
| prenyl (decaprenyl) diphosphate synthase, subunit 1                                          | unknown             | enzyme                     |                                   |            |                  |                       |                        |
| PET112-like (yeast)                                                                          | Cytoplasm           | translation regulator      |                                   |            |                  |                       |                        |
| peroxisomal biogenesis factor 6                                                              | Cytoplasm           | enzyme                     |                                   |            |                  |                       |                        |
| placental growth factor                                                                      | Extracellular Space | growth factor              |                                   |            |                  |                       |                        |
| phosphatidylinositol glycan anchor biosynthesis, class Q                                     | Cytoplasm           | enzyme                     |                                   |            |                  |                       |                        |
| phosphoinositide-3-kinase, regulatory subunit 1 (alpha)                                      | Cytoplasm           | kinase                     |                                   |            |                  |                       |                        |
| phosphatidylinositol transfer protein, cytoplasmic 1                                         | Cytoplasm           | transporter                |                                   |            |                  |                       |                        |
| pyruvate kinase, muscle                                                                      | Cytoplasm           | kinase                     |                                   |            |                  |                       |                        |
| phospholipase A2, group V                                                                    | Extracellular Space | enzyme                     |                                   |            |                  |                       |                        |
| phospholipase C, beta 3 (phosphatidylinositol-specific)                                      | Cytoplasm           | enzyme                     |                                   |            |                  |                       |                        |
| pleckstrin homology domain containing, family A (phosphoinositide binding specific) member 8 | unknown             | other                      |                                   |            |                  |                       |                        |
| pleckstrin homology domain containing, family H (with MyTH4 domain) member 1                 | Cytoplasm           | other                      |                                   |            |                  |                       |                        |
| perilipin 2                                                                                  | Plasma Membrane     | other                      |                                   |            |                  |                       |                        |

| Entrez Gene Name                                                                                                 | Location            | Family                  | Cellular Growth and Proliferation | Cell Death | Lipid Metabolism | Molecule Biochemistry | Cardiovascular Disease |
|------------------------------------------------------------------------------------------------------------------|---------------------|-------------------------|-----------------------------------|------------|------------------|-----------------------|------------------------|
| plexin A2                                                                                                        | Plasma Membrane     | other                   |                                   |            |                  |                       |                        |
| phosphomannomutase 2                                                                                             | Cytoplasm           | enzyme                  |                                   |            |                  |                       |                        |
| paroxysmal nonkinesigenic dyskinesia                                                                             | Nucleus             | other                   |                                   |            |                  |                       |                        |
| pogo transposable element with KRAB domain                                                                       | Nucleus             | other                   |                                   |            |                  |                       |                        |
| peroxisome proliferator-activated receptor alpha                                                                 | Nucleus             | transcription regulator |                                   |            |                  |                       |                        |
| peroxisome proliferator-activated receptor gamma, coactivator 1 alpha                                            | Nucleus             | transcription regulator |                                   |            |                  |                       |                        |
| protein phosphatase, Mg2+/Mn2+ dependent, 1K                                                                     | unknown             | phosphatase             |                                   |            |                  |                       |                        |
| protein phosphatase 1, regulatory (inhibitor) subunit 16B                                                        | Plasma Membrane     | phosphatase             |                                   |            |                  |                       |                        |
| protein kinase D2                                                                                                | Cytoplasm           | kinase                  |                                   |            |                  |                       |                        |
| protein-kinase, interferon-inducible double stranded RNA dependent inhibitor, repressor of (P58 repressor)       | Nucleus             | other                   |                                   |            |                  |                       |                        |
| prolactin receptor                                                                                               | Plasma Membrane     | transmembrane receptor  |                                   |            |                  |                       |                        |
| protein arginine methyltransferase 7                                                                             | Cytoplasm           | enzyme                  |                                   |            |                  |                       |                        |
| PRP19/PSO4 pre-mRNA processing factor 19 homolog (S. cerevisiae)                                                 | Nucleus             | other                   |                                   |            |                  |                       |                        |
| PRP38 pre-mRNA processing factor 38 (yeast) domain containing A                                                  | Nucleus             | other                   |                                   |            |                  |                       |                        |
| pentatricopeptide repeat domain 2                                                                                | unknown             | other                   |                                   |            |                  |                       |                        |
| protein tyrosine phosphatase, non-receptor type 11                                                               | Cytoplasm           | phosphatase             |                                   |            |                  |                       |                        |
| purine-rich element binding protein B                                                                            | Nucleus             | transcription regulator |                                   |            |                  |                       |                        |
| RAB3D, member RAS oncogene family                                                                                | Cytoplasm           | enzyme                  |                                   |            |                  |                       |                        |
| RAP1 GTPase activating protein                                                                                   | Cytoplasm           | other                   |                                   |            |                  |                       |                        |
| Rap guanine nucleotide exchange factor (GEF) 3                                                                   | Nucleus             | other                   |                                   |            |                  |                       |                        |
| RASD family, member 2                                                                                            | Cytoplasm           | enzyme                  |                                   |            |                  |                       |                        |
| RAS guanyl releasing protein 3 (calcium and DAG-regulated)                                                       | Cytoplasm           | other                   |                                   |            |                  |                       |                        |
| Ras association (RalGDS/AF-6) domain family (N-terminal) member 8                                                | unknown             | other                   |                                   |            |                  |                       |                        |
| RNA binding motif protein 18                                                                                     | unknown             | other                   |                                   |            |                  |                       |                        |
| receptor accessory protein 1                                                                                     | Cytoplasm           | other                   |                                   |            |                  |                       |                        |
| RGM domain family, member A                                                                                      | Plasma Membrane     | other                   |                                   |            |                  |                       |                        |
| regulator of G-protein signaling 5                                                                               | Plasma Membrane     | other                   |                                   |            |                  |                       |                        |
| regulator of G-protein signaling 7 binding protein                                                               | unknown             | other                   |                                   |            |                  |                       |                        |
| rhomoid, veinlet-like 3 (Drosophila)                                                                             | Plasma Membrane     | peptidase               |                                   |            |                  |                       |                        |
| ras homolog gene family, member B                                                                                | Cytoplasm           | enzyme                  |                                   |            |                  |                       |                        |
| resistance to inhibitors of cholinesterase 8 homolog B (C. elegans)                                              | unknown             | other                   |                                   |            |                  |                       |                        |
| ring finger protein 187                                                                                          | unknown             | other                   |                                   |            |                  |                       |                        |
| RNA polymerase II associated protein 1                                                                           | unknown             | other                   |                                   |            |                  |                       |                        |
| RNA pseudouridylate synthase domain containing 4                                                                 | unknown             | other                   |                                   |            |                  |                       |                        |
| ribonucleotide reductase M2 B (TP53 inducible)                                                                   | Nucleus             | enzyme                  |                                   |            |                  |                       |                        |
| radical S-adenosyl methionine domain containing 2                                                                | unknown             | enzyme                  |                                   |            |                  |                       |                        |
| reticulon 3                                                                                                      | Cytoplasm           | other                   |                                   |            |                  |                       |                        |
| SH3-binding domain kinase 1                                                                                      | unknown             | kinase                  |                                   |            |                  |                       |                        |
| secretory carrier membrane protein 1                                                                             | Cytoplasm           | transporter             |                                   |            |                  |                       |                        |
| sodium channel, voltage-gated, type IV, beta                                                                     | Plasma Membrane     | ion channel             |                                   |            |                  |                       |                        |
| sodium channel, voltage-gated, type V, alpha subunit                                                             | Plasma Membrane     | ion channel             |                                   |            |                  |                       |                        |
| SEC24 family, member C (S. cerevisiae)                                                                           | Cytoplasm           | transporter             |                                   |            |                  |                       |                        |
| sema domain, immunoglobulin domain (Ig), transmembrane domain (TM) and short cytoplasmic domain, (semaphorin) 4A | Plasma Membrane     | other                   |                                   |            |                  |                       |                        |
| secreted frizzled-related protein 1                                                                              | Plasma Membrane     | transmembrane receptor  |                                   |            |                  |                       |                        |
| small glutamine-rich tetrapeptide repeat (TPR)-containing, alpha                                                 | Cytoplasm           | other                   |                                   |            |                  |                       |                        |
| SH3-binding domain protein 5-like                                                                                | unknown             | other                   |                                   |            |                  |                       |                        |
| SH3-domain kinase binding protein 1                                                                              | Cytoplasm           | other                   |                                   |            |                  |                       |                        |
| SH3 and multiple ankyrin repeat domains 3                                                                        | Cytoplasm           | transcription regulator |                                   |            |                  |                       |                        |
| sirtuin 1 (silent information regulation 2, homolog 1)                                                           | Nucleus             | transcription regulator |                                   |            |                  |                       |                        |
| solute carrier family 12 (potassium/chloride transporters), member 7                                             | Plasma Membrane     | transporter             |                                   |            |                  |                       |                        |
| solute carrier family 26, member 10                                                                              | unknown             | transporter             |                                   |            |                  |                       |                        |
| solute carrier family 35 (UDP-N-acetylglucosamine (UDP-GlcNAc) transporter), member A3                           | Cytoplasm           | transporter             |                                   |            |                  |                       |                        |
| solute carrier family 44, member 1                                                                               | Plasma Membrane     | transporter             |                                   |            |                  |                       |                        |
| solute carrier family 8 (sodium/calcium exchanger), member 1                                                     | Plasma Membrane     | transporter             |                                   |            |                  |                       |                        |
| snail homolog 3 (Drosophila)                                                                                     | Nucleus             | transcription regulator |                                   |            |                  |                       |                        |
| sorbin and SH3 domain containing 1                                                                               | Plasma Membrane     | other                   |                                   |            |                  |                       |                        |
| spectrin beta 1                                                                                                  | unknown             | other                   |                                   |            |                  |                       |                        |
| SPRY domain containing 4                                                                                         | unknown             | other                   |                                   |            |                  |                       |                        |
| serum response factor (c-fos serum response element-binding transcription factor)                                | Nucleus             | transcription regulator |                                   |            |                  |                       |                        |
| sulfiredoxin 1 homolog (S. cerevisiae)                                                                           | Cytoplasm           | enzyme                  |                                   |            |                  |                       |                        |
| signal sequence receptor, beta (translocon-associated protein beta)                                              | Cytoplasm           | other                   |                                   |            |                  |                       |                        |
| ST3 beta-galactoside alpha-2,3-sialyltransferase 5                                                               | Cytoplasm           | enzyme                  |                                   |            |                  |                       |                        |
| starch binding domain 1                                                                                          | Cytoplasm           | other                   |                                   |            |                  |                       |                        |
| serine threonine kinase 39 (STE20/SPS1 homolog, yeast)                                                           | Nucleus             | kinase                  |                                   |            |                  |                       |                        |
| TGF-beta activated kinase 1/MAP3K7 binding protein 1                                                             | Cytoplasm           | enzyme                  |                                   |            |                  |                       |                        |
| tachykinin, precursor 1                                                                                          | Extracellular Space | other                   |                                   |            |                  |                       |                        |
| tudor and KH domain containing                                                                                   | unknown             | other                   |                                   |            |                  |                       |                        |
| thyrotrophic embryonic factor                                                                                    | Nucleus             | transcription regulator |                                   |            |                  |                       |                        |
| transcription factor Dp-1                                                                                        | Nucleus             | transcription regulator |                                   |            |                  |                       |                        |
| translocase of inner mitochondrial membrane 44 homolog (yeast)                                                   | Cytoplasm           | transporter             |                                   |            |                  |                       |                        |
| transmembrane protein 101                                                                                        | Extracellular Space | other                   |                                   |            |                  |                       |                        |
| transmembrane protein 143                                                                                        | Cytoplasm           | other                   |                                   |            |                  |                       |                        |
| transmembrane protein 144                                                                                        | unknown             | other                   |                                   |            |                  |                       |                        |
| transmembrane protein 199                                                                                        | unknown             | other                   |                                   |            |                  |                       |                        |
| transmembrane protein 201                                                                                        | unknown             | other                   |                                   |            |                  |                       |                        |
| transmembrane protein 50B                                                                                        | Plasma Membrane     | other                   |                                   |            |                  |                       |                        |
| transmembrane protein 64                                                                                         | unknown             | other                   |                                   |            |                  |                       |                        |
| TMEM9 domain family, member B                                                                                    | Plasma Membrane     | other                   |                                   |            |                  |                       |                        |
| TRAF2 and NCK interacting kinase                                                                                 | Cytoplasm           | kinase                  |                                   |            |                  |                       |                        |
| tankyrase, TRF1-interacting ankyrin-related ADP-ribose polymerase 2                                              | Nucleus             | enzyme                  |                                   |            |                  |                       |                        |
| translocase of outer mitochondrial membrane 6 homolog (yeast)                                                    | unknown             | other                   |                                   |            |                  |                       |                        |
| tumor protein p53 inducible nuclear protein 1                                                                    | Nucleus             | other                   |                                   |            |                  |                       |                        |
| tribbles homolog 2 (Drosophila)                                                                                  | Plasma Membrane     | kinase                  |                                   |            |                  |                       |                        |
| uracil-DNA glycosylase                                                                                           | Nucleus             | enzyme                  |                                   |            |                  |                       |                        |
| vesicle transport through interaction with t-SNAREs homolog 1A (yeast)                                           | Plasma Membrane     | transporter             |                                   |            |                  |                       |                        |
| wingless-type MMTV integration site family, member 5A                                                            | Extracellular Space | other                   |                                   |            |                  |                       |                        |
| exportin 7                                                                                                       | Nucleus             | transporter             |                                   |            |                  |                       |                        |
| zinc finger, CCHC domain containing 8                                                                            | unknown             | other                   |                                   |            |                  |                       |                        |
| zinc finger protein 131                                                                                          | unknown             | other                   |                                   |            |                  |                       |                        |

Genes with only one 6-mer sequence in the 3'UTR were excluded from this list.
